# 1 **Reactive oxygen species prevent lysosome coalescence during** 2 **PIKfyve inhibition**

3

4 Golam T. Saffi<sup>1,2,3</sup>, Evan Tang<sup>2</sup>, Subothan Inpanathan<sup>1,2</sup>, Sami Mammad<sup>1</sup>, Aaron Fountain<sup>1,2</sup>

5 Leonardo Salmena<sup>3,4</sup>, and Roberto J. Botelho<sup>1,2,\*</sup>

6 <sup>1</sup>Molecular Science Graduate Program and <sup>2</sup>Department of Chemistry and Biology, Ryerson

7 University, Toronto, Ontario, M5B 2K3 Canada

8 <sup>3</sup>Department of Pharmacology & Toxicology, University of Toronto, Toronto, Ontario M5S

9 1A8, Canada

10 <sup>4</sup>Princess Margaret Cancer Centre, University Health Network, Toronto, Ontario M5G 1L7,

11 Canada

12

13 \*To whom correspondence should be sent to: [rbotelho@ryerson.ca](mailto:rbotelho@ryerson.ca)

14

15 **Running title:** Reactive oxygen species prevent lysosome enlargement

16

17 **Keywords:** Lysosomes, reactive oxygen species, membrane trafficking, organelles, fusion,

18 fission, cytoskeleton

19

20 **Abbreviations:** CDNB: 1-chloro-2,4,-dinitrobenzene; FBS: fetal bovine serum; HPF:

21 hydroxylphenyl fluorescein; LAMP1: lysosomal membrane protein-1; LLMEO: L-leucyl-L-

22 leucine methyl ester; MCB: monochlorobimane; MCOLN1: Muco1ipin-1; NAC: N-acetyl-L-

23 cysteine; PFA: paraformaldehyde; PtdInsP: phosphoinositide; PtdIns(3,5)P<sub>2</sub>: phosphatidylinositol-  
24 3,5-bisphosphate; RILP: Rab-Interacting Lysosomal Protein; ROS: reactive oxygen species

25

26 **Acknowledgement:** ARPE-1 (RPE) cells stably expressing clathrin heavy chain-eGFP were a  
27 kind gift from Dr. Costin Antonescu. We would also like to thank Mr. Janusan Baskararajah for  
28 technical assistance.

29 **Funding:** This work was funded by grants awarded to RJB from the Natural Sciences and  
30 Engineering Council of Canada (Grant numbers 372687-2010, 441595-2013, RGPIN-2020-  
31 04343) the Canada Research Chairs Program, Canada Foundation for Innovation (32957) an Early  
32 Researcher Award from the Government of Ontario (ER13-09-042), and contributions from  
33 Ryerson University. The funders had no role in the study design, data collection and analysis,  
34 decision to publish, or preparation of the manuscript.

## 35 **Abstract**

36 Lysosomes are terminal, degradative organelles of the endosomal pathway that undergo repeated  
37 fusion-fission cycles with themselves, endosomes, phagosomes, and autophagosomes. Lysosome  
38 number and size depends on balanced fusion and fission rates. Thus, conditions that favour fusion  
39 over fission can reduce lysosome numbers while enlarging their size. Conversely, favouring fission  
40 over fusion may cause lysosome fragmentation and increase their numbers. PIKfyve is a  
41 phosphoinositide kinase that generates phosphatidylinositol-3,5-bisphosphate to modulate  
42 lysosomal functions. PIKfyve inhibition causes an increase in lysosome size and reduction in  
43 lysosome number, consistent with lysosome coalescence. This is thought to proceed through  
44 reduced lysosome reformation and/or fission after fusion with endosomes or other lysosomes.  
45 Previously, we observed that photo-damage during live-cell imaging prevented lysosome

46 coalescence during PIKfyve inhibition. Thus, we postulated that lysosome fusion and/or fission  
47 dynamics are affected by reactive oxygen species (ROS). Here, we show that ROS generated by  
48 various independent mechanisms all impaired lysosome coalescence during PIKfyve inhibition  
49 and accelerated lysosome fragmentation during re-activation. However, depending on the ROS  
50 species or mode of production, lysosome dynamics were affected distinctly. H<sub>2</sub>O<sub>2</sub> impaired  
51 lysosome motility and reduced lysosome fusion with phagosomes, suggesting that H<sub>2</sub>O<sub>2</sub> reduces  
52 lysosome fusogenicity. In comparison, inhibitors of oxidative phosphorylation, glutathione, and  
53 thioredoxin that produce superoxide, did not impair lysosome motility but instead promoted  
54 clearance of actin puncta on lysosomes formed during PIKfyve inhibition. Additionally, actin  
55 depolymerizing agents prevented lysosome coalescence during PIKfyve inhibition. Thus, we  
56 discovered that ROS can generally prevent lysosome coalescence during PIKfyve inhibition using  
57 distinct mechanisms depending on the type of ROS.

58

## 59 **Introduction**

60 Lysosomes are typically defined as terminal organelles with an acidic and degradative lumen that  
61 digest macromolecules received through endocytosis, phagocytosis and autophagy [1–3]. In  
62 reality, lysosomes are part of an endomembrane spectrum formed through heterotypic and  
63 homotypic fusion between late endosomes that enclose cargo for degradation, terminal lysosomes,  
64 which are non-acidic, hydrolase-dormant storage organelles, and endolysosomes, hybrids formed  
65 when late endosomes and terminal lysosomes fuse together [4–7]; we use the term *lysosome* to  
66 refer to this spectrum. Importantly, fusion and content exchange along the lysosomal spectrum  
67 proceeds through two major routes. First, lysosomes can fuse with a target organelle resulting in  
68 complete merger of the two compartments. Alternatively, lysosomes can exchange content with

69 another target organelle through “kiss-and-run”; in this process, a transient fusion between two  
70 organelles generates an aqueous pore to exchange content and is followed by fission to prevent  
71 amalgamation of the two compartments [6,8–10].

72 Delivery of cargo to lysosomes is an incessant process that depends on cargo sorting,  
73 membrane targeting, and the fusion machinery, which are governed by, among others, the  
74 lysosomal GTPases, Rab7 and Arl8b [11,12]. These GTPases modulate the movement of  
75 lysosomes along microtubule tracks through their effectors; Rab7 uses Rab-Interacting Lysosomal  
76 Protein (RILP) and FYVE and Coiled-Coil Domain Autophagy Adaptor-1 (FYCO1) to engage  
77 dynein and kinesins, thus moving lysosomes towards the cell centre and periphery, respectively  
78 [13,14]. In comparison, Arl8b uses Pleckstrin-Homology and RUN domain containing M2  
79 (PLEKHM2; or SKIP) protein to engage kinesin to promote lysosome positioning to the cell  
80 periphery [15]. When lysosomes contact other lysosomes/late endosomes, this engages tether  
81 complexes like Homotypic Fusion Protein Sorting (HOPS) complex, also modulated by Rab7 and  
82 Arl8b, and eventually undergo fusion [12,16,17]. Lysosome fusion and fission dynamics is also  
83 modulated by intralysosomal  $\text{Ca}^{2+}$  release via Mucolipin-1 (MCOLN1) and P2X4 channels  
84 [18,19].

85 Despite the incessant delivery of content to lysosomes through fusion, cells maintain  
86 lysosome number and size, suggesting that exit of cargo from lysosomes by fission is also  
87 relentless. Yet, much less is known about lysosome fission, which may proceed through  
88 vesiculation, tubulation, and splitting [10]. Lysosome fission mechanisms may include classical  
89 coat and fission machinery such as clathrin and dynamin and actin complexes [10,20–24].  
90 Coordination of these fission machines is poorly understood but likely involves MCOLN1- $\text{Ca}^{2+}$   
91 release [19,25,26]. Additionally, phosphoinositides (PtdInsPs) play a key role in lysosome fission

92 dynamics including modulation of vesiculation versus tubulation [10]. Amongst these, lysosome  
93 fission-fusion cycles are coordinated by the Phosphoinositide Kinase, FYVE-type Zinc Finger  
94 Containing (PIKfyve) lipid kinase that synthesizes phosphatidylinositol-3,5-bisphosphate  
95 [PtdIns(3,5)P<sub>2</sub>] and directly or indirectly, phosphatidylinositol-5-phosphate [27,28].  
96 Pharmacological or genetic disruption of PIKfyve and partner proteins like Vac14 and the Fig4  
97 phosphatase cause enlarged lysosomes, partly by impairing fission and reformation of terminal  
98 lysosomes [4,27,29–31]. The result is lysosome coalescence, enlarging lysosomes while reducing  
99 their numbers [4,30]. It remains unclear how PIKfyve controls lysosome fission but may involve  
100 control of actin-assembly on lysosomes and fission proteins [19,21,26,32].

101 During our studies with acute PIKfyve inhibition, we observed that imaging by spinning  
102 disc confocal microscopy at high frequency inhibited lysosome enlargement caused by PIKfyve  
103 inhibition [30]. We speculated that this resulted from photo-generated reactive oxygen species  
104 (ROS), which can include superoxide anions (O<sub>2</sub><sup>-</sup>), hydrogen peroxide (H<sub>2</sub>O<sub>2</sub>), and hydroxyl  
105 radicals (OH<sup>•</sup>) [33–35]. ROS species are also formed as part of normal aerobic metabolism and  
106 can actually be produced as signaling intermediates to modulate cell proliferation and the  
107 inflammatory response [36,37]. Yet, overt ROS production is detrimental, damaging proteins,  
108 lipids, and DNA. Thus, cells have evolved multiple systems to quench ROS levels such as O<sub>2</sub><sup>-</sup>  
109 dismutase, catalase, glutathione, and thioredoxin [37,38].

110 In this study, we sought to understand if other modes of ROS generation could abate  
111 lysosome coalescence during PIKfyve inhibition and to better define the mechanisms of action.  
112 Strikingly, we found that different sources of ROS reduced lysosome coalescence during PIKfyve  
113 inhibition and accelerated lysosome fragmentation upon PIKfyve reactivation. Interestingly, these  
114 distinct ROS hindered lysosome coalescence differently. H<sub>2</sub>O<sub>2</sub> prevented lysosome coalescence

115 by impairing lysosome motility and blunting lysosome fusogenicity. In comparison, oxidative  
116 decoupling of the mitochondria with rotenone and inhibitors of glutathione and thioredoxin  
117 counteracted lysosome coalescence by releasing actin clusters that accumulated on lysosomes  
118 during PIKfyve impairment.

119

## 120 **Results**

### 121 **Stimulation of ROS suppresses lysosome enlargement during acute** 122 **PIKfyve inhibition**

123 We previously observed that extended laser excitation by spinning disc confocal fluorescence  
124 microscopy arrested lysosome enlargement during acute PIKfyve suppression [30]. We speculated  
125 that this arrest may be due to ROS production caused by light energy [39]. This led us to  
126 hypothesize that other mechanisms of ROS generation could impair lysosome enlargement during  
127 acute inhibition of PIKfyve. To test this, we exposed cells to a variety of ROS inducers: H<sub>2</sub>O<sub>2</sub>,  
128 rotenone, which decouples the mitochondrial electron chain, monochlorobimane (MCB), a  
129 glutathione S-transferase inhibitor, or to the thioredoxin inhibitor, 1-chloro-2,4,-dinitrobenzene  
130 (CDNB) [35,40–42]. We first demonstrated that these manipulations enhanced ROS levels by  
131 using CellROX Green, a redox sensitive dye whose fluorescence is proportional to ROS levels  
132 (Figs 1A-B). Additionally, ROS cause MCB to form fluorescent MCB-glutathione adducts; we  
133 observed 7x more MCB-glutathione adducts relative to vehicle (Fig 1C-1D). To better define the  
134 type(s) of ROS generated by these treatments, we used fluorescent detectors for O<sub>2</sub><sup>-</sup> (ROS-ID),  
135 mitochondrial O<sub>2</sub><sup>-</sup> (MitoSox), OH<sup>-</sup>/peroxynitrite (HPF), and singlet O<sub>2</sub><sup>·</sup> (si-DMA). We found that  
136 H<sub>2</sub>O<sub>2</sub> was the most promiscuous agent generating all species except detectable levels of singlet O<sub>2</sub><sup>·</sup>

137 (Fig 1E-H). In turn, rotenone generated mitochondrial  $O_2^-$  and singlet  $O_2^{\cdot}$  as detected by MitoSox  
138 and si-DMA, respectively (Fig 1E-H), while CDNB favoured production of singlet  $O_2^{\cdot}$  (Fig 1E-  
139 H). MCB did not elicit detectable changes in these probes, though ROS were detected when using  
140 CellRox and GSH-MCB (Fig 1-D).

141 Remarkably, we then observed that all ROS inducers arrested lysosome enlargement in  
142 cells treated with apilimod, a potent and selective PIKfyve blocker (Fig 2). More specifically,  
143 RAW cells treated with apilimod alone suffered an increase in the size of individual lysosomes  
144 (Fig 2B) and a decrease in lysosome number (Fig 2C), indicating that lysosomes coalesced. As we  
145 documented before, the total cellular volume of the lysosome population was unchanged between  
146 resting and apilimod-treated cells (Fig 2D). In comparison, co-exposure of cells with apilimod to  
147 either  $H_2O_2$ , rotenone, MCB or CDNB prevented lysosome enlargement and reduction in lysosome  
148 number (Fig 2A-D). Moreover, we used auranofin as a complementary thioredoxin inhibitor to  
149 CDNB and observed that it too prevented apilimod-induced lysosome coalescence (Fig 2A-D). To  
150 test whether lower  $H_2O_2$  levels (100  $\mu$ M) could also block lysosome coalescence, we used lower  
151 apilimod concentrations (1 or 5 nM). We still observed lysosome coalescence at these lower  
152 concentrations of apilimod and this was prevented in cells that were co-exposed to 100  $\mu$ M  $H_2O_2$   
153 (S1 Fig). No significant changes to lysosome number, size of individual lysosomes and total  
154 lysosome volume were observed when ROS agonists were used alone (Fig 2A-D). The fact that  
155 ROS alone did not appear to further reduce lysosome size and increase lysosome number may  
156 reflect some physical restriction to the smallest lysosome size; for example, osmotic pressure may  
157 prevent a further reduction in the size of basal lysosomes.

158 To provide evidence that ROS were the active agents that blocked lysosome coalescence  
159 during apilimod-treatment, we employed N-acetyl-L-cysteine (NAC) as an anti-oxidant during

160 rotenone co-administration [43]. Indeed, cells co-exposed with apilimod, rotenone and NAC  
161 displayed larger lysosomes than cells co-treated with apilimod and rotenone (Fig 3), indicating  
162 that ROS are the active agents arresting lysosome enlargement during PtdIns(3,5)P<sub>2</sub> depletion.

163 To ensure that these observations were not specific to murine RAW macrophages, we  
164 assessed apilimod-induced lysosome coalescence in human-derived RPE and HeLa cells co-  
165 exposed to H<sub>2</sub>O<sub>2</sub> or CDNB. As with RAW cells, while apilimod-alone induced lysosome  
166 coalescence in HeLa and RPE cells, counterpart cells co-administered apilimod and H<sub>2</sub>O<sub>2</sub> or  
167 CDNB resisted lysosome enlargement and reduction in lysosome number (S2 Fig). As before, no  
168 changes were observed under any treatment to the total lysosomal volume within these cell types  
169 (S2D, S2H Figs). Overall, our observations suggest that generation of ROS via distinct  
170 mechanisms can impair lysosome coalescence caused by PIKfyve inhibition in several cell types.

## 171 **ROS accelerate lysosome fragmentation during PIKfyve reactivation**

172 Removal of apilimod elicited reversal of lysosome coalescence, re-establishing lysosome size and  
173 number after >3 h post drug removal [30]. To test if ROS exposure could accelerate this reversal  
174 in lysosome coalescence, we treated RAW cells with apilimod for 1 h and then incubated cells  
175 with fresh, drug-free medium to reactivate PIKfyve with or without H<sub>2</sub>O<sub>2</sub>, rotenone, CDNB, or  
176 MCB during this wash duration. As before, apilimod increased lysosome size and decreased  
177 lysosome number, while chasing cells for 2 h after drug removal reversed this phenotype partly;  
178 longer incubation ultimately reverses lysosome enlargement completely [30]. Exposure to any of  
179 the ROS agents during the apilimod-free chase accelerated the rate of lysosome fragmentation,  
180 rapidly increasing lysosome number and reducing the size of individual lysosomes (Fig 4A-D).

181 Overall, ROS prevented and reversed lysosome coalescence induced by PIKfyve  
182 inhibition. We next examined levels of PtdIns(3,5)P<sub>2</sub>, lysosome membrane damage, lysosome



183 motility, fusion and fission events in order to better understand the mechanisms that enable ROS  
184 to prevent lysosome coalescence in the absence of PIKfyve activity.

### 185 **ROS stimulation arrests apilimod induced lysosome enlargement** 186 **without neutralizing apilimod or stimulating PtdIns(3,5)P<sub>2</sub> synthesis**

187 To understand the effect of ROS on apilimod-mediated lysosome enlargement, we first considered  
188 the trivial possibility that higher ROS load within cells may degrade the structural integrity of  
189 apilimod, relieving the acute PIKfyve suppression, and thus preventing lysosome coalescence. To  
190 test this, we co-incubated apilimod with H<sub>2</sub>O<sub>2</sub> in complete medium *in vitro* for 40 min. Following  
191 this incubation, we added catalase to decompose H<sub>2</sub>O<sub>2</sub> and then transferred the reaction mixture  
192 onto RAW macrophages to observe if apilimod was still able to induce lysosome enlargement. We  
193 found that apilimod pre-exposed to H<sub>2</sub>O<sub>2</sub> was still able to increase lysosome size and decrease  
194 lysosome number similarly to an aliquot of naïve apilimod (Fig 5A-D), suggesting that H<sub>2</sub>O<sub>2</sub> did  
195 not degrade apilimod. Moreover, while H<sub>2</sub>O<sub>2</sub> arrested apilimod-mediated lysosome enlargement,  
196 the co-addition of catalase to apilimod and H<sub>2</sub>O<sub>2</sub> permitted lysosome enlargement, further  
197 suggesting that H<sub>2</sub>O<sub>2</sub> is a direct suppressor of lysosome coalescence in PIKfyve-inhibited cells  
198 (Fig 5A-D). Therefore, we provide additional evidence that ROS rescue lysosome coalescence  
199 during acute PIKfyve inhibition.

200 We next examined if ROS rescue lysosome coalescence during PIKfyve inhibition by  
201 increasing the levels of PtdIns(3,5)P<sub>2</sub> in cells. In part, this may occur because ROS species  
202 reversibly oxidize catalytic cysteine residues on protein and lipid phosphatases, abating their  
203 activity [37,44,45]. Therefore, augmented ROS levels may inhibit the Fig4 lipid phosphatase,  
204 counteracting PIKfyve inhibition with apilimod and boosting PtdIns(3,5)P<sub>2</sub> levels [31]. This  
205 putative PtdIns(3,5)P<sub>2</sub> elevation may then be sufficient to prevent lysosome coalescence in cells

206 exposed to apilimod and ROS. To test this hypothesis, we measured PtdInsP levels in cells treated  
207 with H<sub>2</sub>O<sub>2</sub> or rotenone with and without apilimod by labelling cells with <sup>3</sup>H-*myo*-inositol and using  
208 HPLC-coupled flow scintillation [46]. However, we observed a similar drop of about 80% in  
209 Ptdns(3,5)P<sub>2</sub> in cells treated with apilimod with or without ROS agents (Fig 5E, F), suggesting that  
210 ROS stimulation does not significantly elevate PtdIns(3,5)P<sub>2</sub> levels. In addition, inhibition of  
211 PIKfyve typically causes an increase in PtdIns(3)P levels (Fig 5E, F). While rotenone had no effect  
212 on this increase, H<sub>2</sub>O<sub>2</sub> appeared to prevent this spike in PtdIns(3)P levels during apilimod treatment  
213 (Fig 5E). The significance of this change is not clear to us but given that rotenone still increased  
214 PtdIns(3)P and prevented lysosome coalescence, it is not likely to explain our observations.  
215 Overall, ROS prevents lysosome coalescence during PIKfyve inhibition via a mechanism that is  
216 independent of PtdIns(3,5)P<sub>2</sub> levels.

## 217 **ROS alter the microtubule system**

218 Since PtdIns(3,5)P<sub>2</sub> levels do not illuminate how ROS prevent lysosome coalescence during  
219 PIKfyve inhibition, we assessed other processes that affect lysosome dynamics. First, we examined  
220 whether ROS altered the microtubule system given its role in facilitating homotypic and  
221 heterotypic lysosome fusion. In fact, we previously showed that disruption of the microtubule  
222 system and microtubule motor activity blocked lysosome coalescence during PIKfyve inhibition  
223 [30]. We inspected the microtubule system in RAW macrophages (Fig 6A-D) and RPE cells (Fig  
224 6E-H) exposed to the ROS agents by immunofluorescence staining against  $\alpha$ -tubulin. We observed  
225 that the ROS agonists altered the microtubule system, but in distinct ways. Relative to untreated  
226 RAW macrophages or RPE cells, qualitative analysis of immunofluorescence images suggest that  
227 H<sub>2</sub>O<sub>2</sub> makes microtubules more stable and extended, whereas increasing concentrations of  
228 rotenone, CDNB and MCB seemed to depolymerize microtubules, resulting in shorter

229 microtubules and diffused staining (Fig. 6). As a proxy to quantify changes to the microtubule  
230 morphology, we employed and validated the use of ImageJ “skeleton” plugin to extract different  
231 parameters of microtubule structure; these included filament junctions, branching, branch length,  
232 and patch area (S3 Fig). It is important to state that these are proxies rather than absolute  
233 descriptors of microtubule morphology. Using these measures, we were able to quantitatively  
234 show that all four ROS types altered the microtubule system with distinct effects. Briefly, H<sub>2</sub>O<sub>2</sub>  
235 increased the number of microtubule junctions per cell and branch length in both RAW and RPE  
236 cells (Fig 6B, D, F and H). In comparison, rotenone, CDNB and MCB decreased the number of  
237 microtubule junctions and branches per cell significantly in RAW cells and increased the patch  
238 area in RPE cells (Fig. 6B, C, I). These observations indicate that type of ROS and/or the site of  
239 ROS synthesis differentially affects microtubules, and potentially lysosome dynamics.

## 240 **Disparate ROS effects on lysosome motility**

241 To dissect these observations further, we considered that microtubule disruption would impair  
242 lysosome motility and/or lysosome fusion. To test this model, we quantified lysosome motility and  
243 the ability of lysosomes to fuse with phagosomes. First, we conducted live-cell imaging over 3  
244 and 6 min for RAW macrophages (Fig. 7A-C, Movies 1-6) and RPE cells (Fig. 7D-F, Movies 7-  
245 13), respectively, treated with vehicle or ROS agents. Using these videos, we then extracted  
246 lysosome speed, track length, and vectorial displacement as indicators of lysosome motility. To  
247 our surprise, H<sub>2</sub>O<sub>2</sub> was the only ROS agent that reduced lysosome speed, track length and vectorial  
248 displacement in RAW and in RPE cells, with the strongest effect on the latter cell type (Fig. 7). To  
249 understand whether microtubule stability was sufficient to impair lysosome coalescence or affect  
250 lysosome motility, we performed a control experiment by treating RAW cells with paclitaxel, a  
251 microtubule stabilizing agent [47]. However, paclitaxel did not impair lysosome coalescence

252 caused by apilimod and may actually enhance lysosome motility indicators (S4 Fig, Movies 14-  
253 16), suggesting that H<sub>2</sub>O<sub>2</sub> blocks apilimod-mediated lysosome enlargement via a distinct  
254 mechanism, perhaps by displacing motors from lysosomes or impairing motor activity. If so, this  
255 does not seem to occur by reducing the levels of GTP-Rab7 or Arl8b GTPase loaded onto  
256 lysosomes as measured by imaging and membrane fractionation (S5 Fig).

257         Given the impaired lysosome motility caused by H<sub>2</sub>O<sub>2</sub>, we next sought to determine if H<sub>2</sub>O<sub>2</sub>  
258 also hindered lysosome fusogenicity by examining phagosome-lysosome fusion as a model. RAW  
259 cells were treated with H<sub>2</sub>O<sub>2</sub> or vehicle for 1 h, followed by phagocytosis of bacteria for 20 min  
260 and a chase period of 40 min to permit phagosome maturation. The degree of phagosome-lysosome  
261 fusion was assessed by quantifying the amount of LAMP-1 fluorescent signal present on bacteria-  
262 containing phagosomes. We observed that H<sub>2</sub>O<sub>2</sub>-treated RAW cells had less LAMP-1 fluorescence  
263 signal localized to bacteria-containing phagosomes compared to vehicle-treated RAW  
264 macrophages (Fig 8). This suggests that H<sub>2</sub>O<sub>2</sub> impaired the ability of lysosomes to fuse with target  
265 organelles, consistent with reduced lysosome motility. Overall, we propose that H<sub>2</sub>O<sub>2</sub> prevents  
266 lysosome coalescence during PIKfyve inhibition by impairing lysosome motility and the  
267 probability of fusion with other organelles, including phagosomes or other lysosomes.

268         In comparison to H<sub>2</sub>O<sub>2</sub>, rotenone, MCB and CDNB did not impair measures of lysosome  
269 motility in RAW macrophages or RPE cells (Fig 7A-C) at concentrations sufficient to block  
270 apilimod-induced lysosome coalescence. Interestingly, nocadazole strongly impaired all measures  
271 in RPE cells but had mild effects on RAW cells (Fig 7). This is likely because RAW macrophages  
272 depolymerized for microtubules appeared to become rounder and taller, causing a wobbling  
273 motion that moved lysosomes in bulk (see Supplemental Movies 1-6). In comparison, RPE cells  
274 were flatter and more resistant to this oscillating effect (see Supplemental Movies 7-13). Given

275 that nocodazole in RPE cells hindered lysosome motility, but CDNB, MCB and rotenone had no  
276 effect on lysosome motility measures in RPE cells, this suggests that rotenone, CDNB and MCB  
277 only partially disrupt the microtubule system. Thus, the extent of microtubule depolymerization  
278 caused by rotenone, CDNB and MCB is not sufficient to explain how these agents prevent  
279 lysosome enlargement during apilimod treatment.

## 280 **ROS effects on lysosome membrane damage and Ca<sup>2+</sup> release**

281 Given the above, we next assessed if and how ROS affected other lysosome properties. One  
282 possibility is that ROS damage the membrane of lysosomes altering their dynamics. To test this,  
283 we transfected RAW macrophages with galectin-3-GFP, which labels damaged lysosomes with  
284 exposed luminal glycoproteins to the cytosol [48,49]. Strikingly, under the conditions used, H<sub>2</sub>O<sub>2</sub>  
285 or rotenone did not induce a significantly higher number of galectin-3-GFP punctate relative to  
286 vehicle-treated cells. As a positive control, we observed a much higher number of galectin-3-GFP  
287 puncta in cells exposed to the lysosome damaging agent, LLMeO (Fig 9). Thus, we suspect that  
288 membrane damage cannot account for the broad ROS-mediated prevention of lysosome  
289 enlargement during PIKfyve inhibition.

290 We next considered if ROS could trigger release of lysosomal Ca<sup>2+</sup>, which in turn could  
291 alter lysosome dynamics [25,50]. In fact, ROS have been connected to release of lysosomal Ca<sup>2+</sup>  
292 via MCOLN1 [51]. To examine if lysosomal Ca<sup>2+</sup> is released by ROS agents, we quantified the  
293 lysosome-to-cytosol fluorescence ratio of Fluo4-AM, a Ca<sup>2+</sup> sensor [52,53], in rotenone and H<sub>2</sub>O<sub>2</sub>-  
294 treated cells. Whereas rotenone had no apparent effect in this ratio, we observed an increase in  
295 cytosolic Ca<sup>2+</sup> levels relative to lysosome in H<sub>2</sub>O<sub>2</sub>-treated cells (Fig. 10A, B). However, pre-  
296 treating cells with BAPTA-AM did not affect basal lysosome number and volume, or block  
297 apilimod-induced lysosome coalescence, nor did it alter H<sub>2</sub>O<sub>2</sub> or rotenone prevention of lysosome

298 coalescence (Fig. 10C-F). Overall, the data suggest that the effects by ROS are not likely mediated  
299 by Ca<sup>2+</sup> or lysosome damage.

## 300 **Clathrin and dynamin are not required for ROS-induced lysosome** 301 **fragmentation**

302 Lysosomes and related organelles such as autolysosomes can assemble fission machinery,  
303 including the canonical fission components, clathrin and dynamin [10,23,24,54]. We sought to  
304 determine if ROS species like H<sub>2</sub>O<sub>2</sub> stimulate clathrin and dynamin-2 to boost fission and prevent  
305 lysosome coalescence during PIKfyve inhibition. First, we observed no changes in the levels of  
306 lysosome-associated clathrin-eGFP in vehicle or apilimod-treated RPE cells. In comparison,  
307 clathrin-eGFP was recruited at higher levels to lysosomes labelled with Alexa<sup>546</sup>-conjugated  
308 dextran after H<sub>2</sub>O<sub>2</sub> treatment in both the presence or absence of apilimod (S6A-B Fig). To  
309 complement our observations, we treated RAW 264.7 cells with vehicle or H<sub>2</sub>O<sub>2</sub>, followed by  
310 sucrose gradient ultracentrifugation to fractionate organelles and probed for clathrin and dynamin  
311 by Western blotting. We saw a consistent increase in the level of clathrin and dynamin-2 to  
312 LAMP1-positive lysosome fractions in cells treated with H<sub>2</sub>O<sub>2</sub> relative to resting cells (S6C-E  
313 Fig). To test whether this enhanced recruitment of clathrin and dynamin aided in lysosome  
314 fragmentation during PIKfyve reactivation in the presence of H<sub>2</sub>O<sub>2</sub>, we inhibited clathrin and  
315 dynamin with ikarugamycin and dyngo-4a, respectively [55,56]. Nevertheless, there was no  
316 significant difference in the H<sub>2</sub>O<sub>2</sub>-mediated rescue of lysosome coalescence during PIKfyve  
317 reactivation when clathrin or dynamin were arrested (Fig 11, S7 Fig). Similarly, there was no  
318 difference in lysosome fragmentation during rotenone exposure when cells were incubated with  
319 dyngo-4a (S7 Fig). Overall, while at least H<sub>2</sub>O<sub>2</sub> seems to recruit clathrin and dynamin to lysosomes

320 (and perhaps other membranes), our data do not support a role for clathrin and dynamin in  
321 preventing lysosome coalescence during PIKfyve inhibition under the used conditions.

## 322 **ROS prevents lysosome coalescence by actin depolymerization**

323 There is growing evidence that F-actin-based structures may regulate endosomal and lysosomal  
324 fission, either through the action of acto-myosin constriction or the assembly of fission machinery  
325 that remains to be fully defined [10,21,57]. In fact, work by Hong et al. suggests that PIKfyve  
326 inhibition causes branched actin accumulation on endosomes; based on their markers used to  
327 identify endosomes, lysosomes were likely included in their analysis [21]. We set to understand  
328 if at least some ROS can prevent lysosome coalescence during PIKfyve inhibition by eliminating  
329 these F-actin assemblies on lysosomes. Indeed, PtdIns(3,5)P<sub>2</sub> depletion increased the number of  
330 F-actin puncta associated with lysosomes detectable by fluorescent-phalloidin staining (Fig 12A,  
331 B), as previously reported [58,59]. Interestingly, co-administration of rotenone or CDNB with  
332 apilimod reduced F-actin puncta associated with lysosomes (Fig 12A, B). These observations  
333 indicate that ROS generated by rotenone and CDNB help prevent or reverse lysosome coalescence  
334 during PIKfyve inhibition by boosting actin turnover on lysosomes.

335 To further test whether actin depolymerization helps prevent lysosome coalescence during  
336 PIKfyve inhibition and accelerate lysosome fragmentation during PIKfyve inhibition, we  
337 compared lysosome volumetrics in cells treated with the actin depolymerizing agents, cytochalasin  
338 B or latrunculin A. We found that both cytochalasin B and latrunculin A treatments hindered  
339 lysosome coalescence during apilimod treatment, as well as accelerated lysosome fragmentation  
340 after apilimod removal and PIKfyve reactivation (Fig 12C-F). Collectively, our observations  
341 suggest that at least certain types of ROS prevent lysosome coalescence during acute PIKfyve  
342 inhibition by alleviating F-actin amassed on lysosomes, likely facilitating fission.

343

## 344 **Discussion**

345 Low PtdIns(3,5)P<sub>2</sub> levels causes multiple defects including impaired autophagic flux, nutrient  
346 recycling, and phagosome resolution [10,27]. These defects are likely derived from the inability  
347 of lysosomes to reform or separate after fusion with other lysosomes, late endosomes, phagosomes,  
348 and autolysosomes [4,10,30,60,61]. As a corollary, lysosomes coalesce to become larger but fewer  
349 [4,30]. Thus, identification of mechanisms or compounds that can drive lysosome fission may  
350 prove useful to rescue autophagic flux, degradative capacity, and lysosome dynamics in cells  
351 exhibiting reduced PtdIns(3,5)P<sub>2</sub> levels. Such mechanisms or compounds may act to up-regulate  
352 PtdIns(3,5)P<sub>2</sub> levels in conditions of insufficient PIKfyve activity like those caused by null-  
353 mutations in the Fig4 lipid phosphatase [29]. For example, the cyclin/cyclin-dependent kinase,  
354 Pho80/Pho85, phosphorylates Fab1 to upregulate the levels of PtdIns(3,5)P<sub>2</sub> in response to  
355 hypertonic shock, protecting yeast cells from osmotic shock [62,63]. Alternatively, activating  
356 mechanisms downstream of PtdIns(3,5)P<sub>2</sub> that enable lysosome fission directly may also rescue  
357 lysosome dynamics.

358 We previously observed that photo-toxicity during live-cell imaging with spinning disc  
359 confocal microscopy prevented lysosome coalescence during apilimod-mediated PIKfyve  
360 inhibition [30]. While unfortunately blunting our ability to perform high spatio-temporal resolution  
361 of lysosome enlargement by live-cell imaging, we questioned if other sources of ROS could also  
362 prevent lysosome coalescence during PIKfyve inhibition. Indeed, we provide evidence here that  
363 ROS generated by diverse approaches can counteract and even reverse lysosome coalescence  
364 during PIKfyve inhibition. Notably, neither H<sub>2</sub>O<sub>2</sub> or rotenone rescued lysosome size by up-  
365 regulating the levels of PtdIns(3,5)P<sub>2</sub>. This suggests that ROS counteract lysosome coalescence by



366 acting downstream of PtdIns(3,5)P<sub>2</sub>, or by stimulating parallel processes that promote lysosome  
367 fission or impair lysosome fusion. Notably, ROS agents alone did not appreciably alter basal  
368 lysosome properties like lysosome size and number. This may partially relate to resolution limit  
369 of light microscopy as we estimate the radius of intact lysosomes to be 0.7 μm, or due to physical  
370 constraints of lysosomes that prevent smaller average lysosome size, or perhaps because the  
371 mechanisms responsible for basal lysosome dynamics are insensitive to ROS effects. Collectively,  
372 our work suggests that ROS prevent lysosome enlargement during PIKfyve inhibition, but exact  
373 mode of action may depend on ROS type, and/or mode of production, and/or location since H<sub>2</sub>O<sub>2</sub>  
374 had distinct effects from those by CDNB/auranofin, MCB and rotenone.

375 We previously showed that disrupting the microtubule system with nocodazole or  
376 impairing motor proteins abated lysosome coalescence during PIKfyve inhibition [30]. Thus, we  
377 explored whether ROS agents disrupted lysosome motility, which would impair fusogenicity. We  
378 observed that only H<sub>2</sub>O<sub>2</sub> significantly arrested lysosome motility and reduced fusogenicity. In  
379 addition, we also saw a more defined microtubule network in H<sub>2</sub>O<sub>2</sub>-treated cells, suggesting that  
380 microtubules were stabilized by H<sub>2</sub>O<sub>2</sub>. Whether this effect is generalizable is debatable since there  
381 are contradictory observations about the effect of H<sub>2</sub>O<sub>2</sub> on the microtubule system, which may  
382 depend on cell type and experimental conditions employed [64–66]. Regardless, microtubule  
383 stabilization is not sufficient to impair lysosome motility since paclitaxel did not prevent lysosome  
384 enlargement caused by apilimod or impair lysosome motility. Thus, we propose that H<sub>2</sub>O<sub>2</sub> impairs  
385 lysosome motility by disrupting motor activity, and/or impairing motor interactions with  
386 lysosomes and/or microtubules. Mitochondria may offer some insight since their motility was also  
387 arrested by H<sub>2</sub>O<sub>2</sub> [65]. H<sub>2</sub>O<sub>2</sub> stimulated p38α MAPK, which then interrupted motor adaptor  
388 complex function. Motors themselves retained their activity since forced anchorage of kinesin to

389 mitochondria maintained mitochondrial motility in the presence of H<sub>2</sub>O<sub>2</sub> [65]. Thus, H<sub>2</sub>O<sub>2</sub> may  
390 disrupt kinesin and/or dynein adaptors like RILP-ORP1L-dynein or SKIP-kinesin, though our  
391 work suggests that this is not likely occurring by altering GTP-Rab7 and Arl8b loading onto  
392 lysosomes.

393         In comparison to H<sub>2</sub>O<sub>2</sub>, ROS produced by mitochondrial uncoupling (rotenone) or amassed  
394 by disrupting catalase and thioredoxin (MCB and CDNB/auranofin) partially depolymerized the  
395 microtubule system under the employed conditions, though not sufficiently enough to hinder  
396 lysosome motility. Instead, these agents may prevent overt lysosome coalescence by releasing a  
397 dense F-actin network that assembles on lysosomes during PIKfyve inhibition. Consistent with  
398 this, actin depolymerizers also reduced lysosome coalescence during acute PIKfyve inhibition and  
399 accelerated lysosome fragmentation during PIKfyve reactivation. These observations may be  
400 consistent with those by Hong *et al.*, wherein PtdIns(3,5)P<sub>2</sub> modulates branched actin dynamics  
401 on endosomes (markers apply to lysosomes as well) by regulating cortactin [21]. The authors  
402 showed that PIKfyve inhibition increased actin density on endo/lysosomes, which consequently  
403 impaired fission and caused enlargement [21]. Additionally, PIKfyve was recently shown to  
404 modulate branched F-actin to help drive melanosome maturation [58]. Indeed, branched F-actin  
405 has emerged as a major player in membrane fission for endo/lysosomes nucleated by ER-  
406 endo/lysosomes contact sites [67,68]. Thus, we propose that ROS generated by rotenone,  
407 CDNB/auranofin, and perhaps MCB, may abate lysosome coalescence by relieving dense F-actin  
408 networks that form on lysosomes during PIKfyve inhibition.

409         While oxidative stress in cells can hinder lysosome coalescence during PIKfyve inhibition  
410 and accelerate lysosome fragmentation during PIKfyve reactivation, the exact mechanisms of  
411 action depends on the type of ROS and/or mode of production. Of the treatments we employed,

412 H<sub>2</sub>O<sub>2</sub> was able to produce cytosolic and mitochondrial superoxide O<sub>2</sub><sup>-</sup> and OH<sup>•</sup> radicals, but no  
413 detectable levels of singlet O<sub>2</sub> (Fig 1); likely, the ROS generated was delocalized as well. In  
414 comparison, rotenone and CDNB released singlet O<sub>2</sub>, while rotenone also released mitochondrial  
415 superoxide and singlet O<sub>2</sub>; neither treatment appeared to produce OH<sup>•</sup> radicals (Fig. 1). We  
416 propose that the likely delocalized release of ROS and OH<sup>•</sup> generated by H<sub>2</sub>O<sub>2</sub> may stabilize  
417 microtubules and impair motor dynamics, which then impinges on lysosome dynamics [69–71].  
418 In comparison, mitochondrial O<sub>2</sub><sup>-</sup> and singlet O<sub>2</sub> increases turnover of the lysosomal F-actin  
419 network to shift lysosome dynamics towards fission. While we could not detect specific ROS in  
420 MCB, MCB interacts with GSH and with thiol residues of other enzymes such as thioredoxin  
421 reductase, leading to increased O<sub>2</sub><sup>-</sup> production [41,70,72]. Overall, future work should aim to better  
422 delineate the type of ROS and their exact target that alter lysosome dynamics. Moreover, since  
423 ROS can serve as physiological signals [37,73], it is tempting to suggest that particular ROS may  
424 play a role in coordinating localized processes like membrane fusion, motor activity, and  
425 membrane fission. This process or the sensors engaged by ROS may represent approaches to  
426 rescue lysosome dynamics in conditions of PtdIns(3,5)P<sub>2</sub> insufficiency.

427

## 428 **Materials and Methods**

### 429 **Cell culture, plasmids, and transfection**

430 RAW 264.7 macrophages and HeLa cells were grown in Dulbecco's Modified Eagle Medium  
431 (DMEM; Wisent, St Bruno, QC) supplemented with 5% heat-inactivated fetal bovine serum (FBS;  
432 Wisent). ARPE-1 (RPE) cells stably expressing clathrin light chain-eGFP were grown in  
433 DMEM/F12 medium (Gibco) supplemented with 10% FBS [74]. All cells were grown at 5% CO<sub>2</sub>

434 and 37 °C and routinely checked for contamination. FuGene HD (Promega, Madison, WI) was  
435 used for transient transfections following manufacturer's instructions with a ratio of 3:1 FuGene  
436 HD transfection reagent ( $\mu$ l) to DNA ( $\mu$ g). The transfection mixture was replaced with fresh  
437 complete medium 4-5 h post-transfection and cells were used 24 h following transfection. RAW  
438 cells were transfected with plasmids expressing Rab7-RILPC33-GFP (RILPC33-GFP), or wild-  
439 type Arl8b-GFP (Arl8bWT-GFP), previously described in [13,75], or Galectin-3-GFP (Addgene;  
440 [48]). The bacterial expression vector pZsGreen (Takara Bio USA, Inc., formerly Clontech  
441 Laboratories, Inc., 632446) was transformed into E. coli DH5 $\alpha$  to generate ZsGreen-expressing  
442 bacteria.

443

#### 444 **Pharmacological treatment of cells**

445 Apilimod (Toronto Research Chemicals, Toronto, ON) was used at 20 nM for 40 min, unless  
446 otherwise indicated, to deplete cellular PtdIns(3,5)P<sub>2</sub>. H<sub>2</sub>O<sub>2</sub> (Bio Basic, Markham, ON) was used  
447 as indicated. Rotenone, 1-chloro-2,4,-dinitrobenzene (CDNB), auranofin, and  
448 monochlorobimane (MCB; Sigma-Aldrich, all from Sigma-Aldrich, Oakville, ON) were used as  
449 indicated to generate ROS by respectively inhibiting mitochondrial respiratory chain complex,  
450 glutathione, or thioredoxin reductase (CDNB and auranofin). Bovine liver catalase (Sigma-  
451 Aldrich) and N-acetyl-L-cysteine (NAC) (Bio Basic) were used as anti-oxidants. Paclitaxel and  
452 nocadazole (both from Sigma-Aldrich) were used at 1 or 10  $\mu$ M and 5 or 10  $\mu$ M to stabilize and  
453 depolymerize microtubules, respectively. Latrunculin A (Abcam, Toronto, ON) and cytochalasin  
454 D (EMD Millipore, Toronto, ON) were used at 1  $\mu$ M and 5  $\mu$ M, respectively to depolymerize  
455 actin. Ikarugamycin (Sigma-Aldrich) and dyngo-4A (Abcam, Cambridge, MA) used to inhibit  
456 clathrin and dynamin respectively. BAPTA-AM (Sigma-Aldrich) was used to chelate intracellular

457 calcium and Fluo4-AM (ThermoFisher, Burlington, ON) was used as a fluorescent Ca<sup>2+</sup> probe. As  
458 a positive control for lysosome damage, we treated cells for 2 h with 0.5 mM L-leucyl-L-leucine  
459 methyl ester (LLOMe; L7393, Sigma-Aldrich).

460

## 461 **Lysosome labelling**

462 Lysosomes were labelled by incubating cells with 200 µg/mL Alexa<sup>546</sup>-conjugated dextran or with  
463 200 µg/mL Alexa<sup>488</sup>-conjugated dextran (Thermo Fisher Scientific, Mississauga, ON) or with 2.5  
464 mg/mL Lucifer yellow (Thermo Fisher Scientific, Mississauga, ON) for 2 h in complete media at  
465 37 °C in 5% CO<sub>2</sub>. Cells washed with phosphate-buffered saline (PBS) and resupplied with  
466 complete cell-specific media for 1 h to chase the fluid-phase marker to lysosomes before  
467 pharmacological manipulation and live-cell imaging. We note that we use “lysosomes” to  
468 represent a potential mixture of late endosomes, lysosomes and endolysosomes (Bright et al., 1997;  
469 Choy et al., 2018). Lysosomal calcium was labelled with Fluo-4AM 8 µM by pulsing for 45 min  
470 in complete media at 37 °C in 5% CO<sub>2</sub>, followed by washing with PBS and addition of complete  
471 media for 45 min to chase the marker to lysosomes.

472

## 473 **Live- and fixed-cell spinning disc confocal microscopy**

474 Microscopy and imaging were done with a Quorum Diskovery spinning disc confocal microscope  
475 system equipped with a Leica DMI8 microscope connected to an iXON 897 EMCCD camera,  
476 controlled by Quorum Wave FX powered by MetaMorph software, using 63x 1.4 NA oil-  
477 immersion objective (Quorum Technologies, Guelph, ON). Live-cell imaging was performed  
478 using environmental chamber set to 5% CO<sub>2</sub> and 37 °C in complete cell-specific medium. Standard  
479 excitation and emission filter sets and lasers were used for all fluorophores. RAW and HeLa cells,

480 unless otherwise indicated, were imaged as z-projections of 45-55 z-planes with 0.3  $\mu\text{m}$  distance  
481 between each plane, or 20-30 z-planes with 0.3  $\mu\text{m}$  distance between each plane for RPE cells, as  
482 acquired by spinning disc confocal microscopy. For time-lapse imaging, RAW cells were imaged  
483 using single, mid-section z-plane every 4 s for 3 min. RPE cells were imaged using single, mid-  
484 section z-plane every 8 s for 6 min. Clathrin-eGFP expressing RPE cells were imaged every 2 min  
485 for 40 min.

486

## 487 **Detection of ROS production**

488 For determining intracellular net ROS production, we incubated RAW 264.7 macrophages with 5  
489  $\mu\text{M}$  of the cell-permeable redox sensitive dye, CellROX Green (Thermo Fisher Scientific), for 30  
490 min at 37  $^{\circ}\text{C}$  with 5%  $\text{CO}_2$  in the dark during treatment with various ROS producing agents.  
491 Cells were washed twice with PBS followed by replenishment with complete media and  
492 imaging. To detect specific intracellular ROS, we used several probes: hydroxylphenyl  
493 fluorescein to detect hydroxyl radical and peroxynitrite (HPF; Thermo Fisher Scientific),  
494 MitoSOX Red for mitochondrial superoxide (Thermo Fisher Scientific), Biotracker Si-DMA for  
495 singlet oxygen (Millipore Sigma), and ROS-ID detection kit (Enzo Life Sciences) for general  
496 superoxide. After treatment with ROS inducers, cells were washed with PBS 3x before adding  
497 these fluorescent probes. Cells were incubated with 5  $\mu\text{M}$  MitoSOX Red for 10 min at 37  $^{\circ}\text{C}$  with  
498 5%  $\text{CO}_2$  in the dark, or 100 nM Si-DMA or 10  $\mu\text{M}$  HPF for 45 minutes. For ROS-ID 0.06 nM  
499 ROS-ID was added 1 h before, incubated at 37  $^{\circ}\text{C}$  with 5%  $\text{CO}_2$  in the dark, followed by washing  
500 with PBS and adding ROS inducers. After treatment with ROS probes or inducers, cells were

501 washed 3x PBS and supplemented with probe specific media. All experiments were imaged  
502 using live-cell spinning disc confocal microscopy as described.

### 503 **Immunofluorescence and F-actin imaging**

504 Following experimentation, cells were fixed for 15 min with 4% (v/v) paraformaldehyde in PBS,  
505 permeabilized for 10 min with 0.1% Triton X-100 (v/v) in PBS, and then blocked with 3% BSA  
506 (v/v) in PBS. Subsequently, cells were incubated with mouse monoclonal antibody against  $\alpha$ -  
507 tubulin (1:200; Sigma-Aldrich), followed by incubation with donkey Dylight-conjugated  
508 polyclonal antibody against mouse IgG (1:1000; Bethyl), and samples were then mounted in Dako  
509 mounting media for subsequent imaging. Alternatively, lysosomes were labelled with Alexa<sup>488</sup>-  
510 conjugated dextran as before, followed by fixation for 15 min with 4% (v/v) paraformaldehyde,  
511 permeabilized for 10 min with 10  $\mu$ g/ml digitonin (Promega, Madison, WI), and blocked with 3%  
512 BSA (v/v), all solutions in PBS. Cells were then stained for F-actin with fluorescent-phalloidin  
513 (ThermoFisher Scientific).

### 514 **Lysosome damage detected by galectin-3-GFP**

515 RAW cells were seeded in DMEM supplemented with 5% FBS for 24 h at 37 °C in 5% CO<sub>2</sub>. Cells  
516 were transfected with Galectin-3-GFP plasmid (0.5  $\mu$ g) using FuGene HD (Promega, Madison,  
517 WI) with a ratio of 3:1 for 24 h at 37 °C in 5% CO<sub>2</sub>. Post-transfection, cells were treated with 1  
518 mM H<sub>2</sub>O<sub>2</sub> for 40 min, 1  $\mu$ M rotenone for 60 min or for 2 h with 0.5 mM L-leucyl-L-leucine methyl  
519 ester (LLOMe; L7393, Sigma-Aldrich).

520

## 521 **Image analysis**

522 To determine lysosome number, individual lysosome volume and total cellular lysosome volume,  
523 we used Volocity (Volocity 6.3.0) particle detection and volumetric tools. Z-stack images were  
524 imported into Volocity and a signal threshold was applied at 2x the average cytosolic fluorescence  
525 intensity. Particles were defined as being greater than  $0.3 \mu\text{m}^3$  for inclusion into the analysis, and  
526 if necessary, a watershed function was applied to split lysosome aggregates caused by  
527 thresholding. Regions of interest were drawn surrounding individual cells for cell-to-cell analysis.  
528 Lysosome speed, track length, and displacement were assessed using Imaris (BitPlane, Concord,  
529 MA) with 'ImarisTrackLineage' module.

530 To determine the level of membrane-bound RILP-C33 and Arl8b, we estimated the  
531 membrane-bound to cytosolic ratio of fluorescently-tagged proteins. Using ImageJ, lines that were  
532 3-pixel wide by 20-40-pixel long were assigned to areas of transfected cells using a predetermined  
533 grid to avoid bias but excluding the nucleus. Plot profiles were then obtained, exported into an  
534 Excel spreadsheet, values were arranged according to fluorescence intensity, and the ratio  
535 calculated for highest 10 pixels over lowest 10 pixels along the length of the line ( $F_H/F_L$   
536 fluorescence ratio); the expectation is that values approximate to 1 represent low membrane signal  
537 due to mostly cytosolic signal, while ratio values greater than 1 represent signal that localizes to  
538 punctate structures relative to cytosol (Chintaluri et al., 2018).

539 For determination of clathrin-GFP on lysosomes, RPE cells stably expressing clathrin  
540 heavy chain-eGFP were loaded with Alexa<sup>546</sup>-conjugated dextran and treated with apilimod,  
541 followed by imaging with spinning disc confocal microscope. Image analysis was performed  
542 using ImageJ by thresholding Alexa<sup>546</sup>-conjugated dextran signal and generating a mask, which  
543 was then applied to the green (clathrin) channel to determine the GFP fluorescence intensity on  
544 regions marked by dextran signal. Regions of interest within the cytosol and the extracellular



545 space were drawn to respectively obtain mean cytosolic fluorescence intensity and background.  
546 These values were then used to calculate the ratio of lysosome-to-cytosol clathrin-eGFP. Similar  
547 approach was employed to determine Fluo-4AM intensity for dextran Alexa<sup>546</sup> lysosomal  
548 structures over cytosolic Fluo-4AM to obtain lysosome-to-cytosol Fluo-4AM intensity ratio. To  
549 determine the fluorescence of intracellular CellROX Green or other ROS probes, images were  
550 imported onto Volocity (Volocity 6.3.0) or ImageJ, regions of interest were drawn around cell,  
551 and mean fluorescence intensity per cell was recorded and background-corrected. For galectin-3-  
552 GFP analysis, images were imported into ImageJ, background-corrected, and then thresholding  
553 was applied to each individual transfected cell (25-30 cells per condition) to identify galectin-3-  
554 GFP puncta. Particles ranging between 50-1000  $\mu\text{m}^2$  were then counted, with the assumption that  
555 smaller size particles corresponded to noise.

556 To assess microtubule structure, we sought to use several measures as proxies for  
557 microtubule alteration under different treatments. Single-plane images were converted to 8-bit  
558 images through ImageJ followed by application of fluorescence intensity threshold to select  
559 microtubules. Images were converted to binary and filaments analyzed through “skeleton” and  
560 “Analyzeskeleton”. Total number of microtubules junctions, where junctions represent  
561 filamentous pixels from where two or more microtubule branches arise, total number of  
562 microtubule branches and average microtubule branch length were scored and collected for data  
563 analysis. Alternatively, RPE cell microtubule structure was analyzed through applying binary filter  
564 to fluorescent microtubules, followed by watershed segmentation to segregate microtubules into  
565 areas of tubulin patches with the expectation that depolymerized microtubules pool into large  
566 patches compared to intact tubulin.

567 Image contrast enhancement was performed with Adobe Photoshop CS (Adobe Systems,  
568 San Jose, CA) or ImageJ without changing relative signals and applied after quantification. Adobe  
569 Illustrator CS (Adobe Systems) was used for constructing figures.

570

## 571 **Lysosome fractionation**

572 RAW 264.7 cells were grown and used according to manufacturer's instructions to obtain  
573 membrane fractions by differential sedimentation ultracentrifugation using a density gradient  
574 (Lysosome Isolation Kit, Sigma-Aldrich, LYSIS01). Briefly, cells were lysed and homogenates  
575 centrifuged 1,000  $xg$  for 10 min at 4 °C to separate unbroken cells and debris from cytoplasmic  
576 membranes. The supernatant was further centrifuged at 20,000  $xg$  for 20 min at 4 °C to pellet  
577 lysosomes and other organelles. The pellet was reconstituted with Optiprep density gradient  
578 medium (60% (w/v) solution of iodixanol in water and sucrose) and loaded onto of a step-wise  
579 sucrose gradient as described by the manufacturer and subjected to ultracentrifugation at 150,000  
580  $xg$  for 4 h at 4 °C using SW50.1 rotor (Beckman Coulter, Mississauga, ON). Fractions were then  
581 collected and subject to denaturation with Laemmli buffer until further use.

582

## 583 **Membrane fractionation**

584 RAW cells were lysed in 200  $\mu$ l ice cold homogenization buffer (3 mM imidazole, 250 mM  
585 sucrose, 0.5 mM EDTA, pH 7.4 with protease inhibitor cocktail). Cells were homogenized by  
586 passing 10x through a 25-gauge needle, then lysates were sequentially centrifuged at 3000  $xg$  for  
587 10 min at 4 °C and 7,000  $xg$  for 10 min at 4°C to clear supernatants. Supernatants were then  
588 further centrifuged at 100,000  $xg$  using SORVALL wX+ULTRA-centrifuge (Thermo Scientific)  
589 for 30 min at 4°C to separate cytosol and membranes. Next, the pellets were resuspended in 0.5%

590 digitonin in solubilization buffer (50 mM NaCl, 50 mM imidazole, 2.5 mM 6-aminohexanoic acid,  
591 2 mM EDTA, pH ~7) to obtain membrane-bound materials.

## 592 **Western Blotting**

593 For whole-cell lysates in 2x Laemmli buffer, cells were passed six times through 27-gauge needle,  
594 heated. Cell lysates or cell fractions were resolved through SDS-PAGE with 10% acrylamide  
595 resolving gel. Proteins were then transferred to a PVDF membrane, blocked and incubated with  
596 primary and HRP-conjugated secondary antibodies in Tris-buffered saline containing 5% skimmed  
597 milk and 0.1% Tween-20. Clarity enhanced chemiluminescence (Bio-Rad Laboratories,  
598 Mississauga, ON) was used to visualize proteins with ChemiDoc Touch Imaging system (Bio-  
599 Rad). Protein quantification was performed using Image Lab software (Bio-Rad) by sequentially  
600 normalizing against a loading control and against vehicle-treated condition. We used rabbit  
601 polyclonal antibodies against VAPB (1:3000, HPA013144, Sigma-Aldrich) and vinculin (1:1000,  
602 4650, Cell Signalling Technologies), rabbit XP® monoclonal antibodies against Rab7 (1:100,  
603 D95F2, Cell Signalling Technologies), mouse monoclonal antibodies against clathrin heavy chain  
604 (1:500, sc-12734, Santa Cruz Biotechnology), Arl8a/b (1:500, clone H8, Santa Cruz  
605 Biotechnology), and ATP5A (1:2000, ab14748, Abcam), rat monoclonal antibodies against  
606 LAMP1 (1:200-1:500, 1D4B, Developmental Studies Hybridoma Bank, Iowa City, IO or Santa  
607 Cruz Biotechnology), and goat polyclonal antibody against dynamin 2 (1:1000, sc-6400, Santa  
608 Cruz Biotechnology). Secondary antibodies were raised in donkey (Bethyl) and HRP-conjugated.  
609

610 **Phosphoinositide labelling with  $^3\text{H}$ -*myo*-inositol and HPLC-coupled**  
611 **flow scintillation**

612 RAW cells were incubated for 24 h with inositol-free DMEM (MP Biomedica, CA) containing 10  
613  $\mu\text{Ci/ml}$  *myo*-[2- $^3\text{H}$ (N)] inositol (Perkin Elmer, MA), 1X insulin-transferrin-selenium-  
614 ethanolamine (Gibco), 10% dialyzed FBS (Gibco), 4 mM L-glutamine (Sigma-Aldrich) and 20  
615 mM HEPES (Gibco). Cells were then treated with rotenone,  $\text{H}_2\text{O}_2$  and/or apilimod as indicated.  
616 Cells were lysed and lipids precipitated with 600  $\mu\text{l}$  of 4.5% perchloric acid (v/v) for 15 min on  
617 ice, collected by scraping and pellet obtained at 12000  $\times g$  for 10 min. Then, 1 ml of 0.1 M EDTA  
618 was used to wash pellets followed by resuspension in 50  $\mu\text{l}$  water. This was followed by 500  $\mu\text{l}$  of  
619 methanol/40% methylamine/1-butanol [45.7% methanol: 10.7% methylamine: 11.4% 1-butanol  
620 (v/v)] used for 50 min at 53  $^\circ\text{C}$  to deacylate phospholipids. Sample pellets were vacuum-dried and  
621 washed twice in 300  $\mu\text{l}$  water with vacuum-drying. Deacylated phospholipids were extracted from  
622 dried sample pellets by resuspending pellet in 450  $\mu\text{l}$  water and 300  $\mu\text{l}$  1-butanol/ethyl ether/ethyl  
623 formate (20:4:1), vortexing 5 min, followed by centrifugation 12000  $\times g$  for 2 min and then the  
624 bottom aqueous layer was collected. Extraction was performed three times followed by vacuum-  
625 drying the aqueous layer and resuspending lipids in 50  $\mu\text{l}$  water. For all treatment samples, equal  
626  $^3\text{H}$  counts were loaded and separated by HPLC (Agilent Technologies, Mississauga, ON) through  
627 4.6 x 250-mm anion exchange column (Phenomenex, Torrance, CA) using a 1 ml/min flow rate  
628 with a gradient set with water (buffer A) and 1 M  $(\text{NH}_4)_2\text{HPO}_4$ , pH 3.8 (phosphoric acid adjusted)  
629 (buffer B) as follows: 0% B for 5 min, 0 to 2% B for 15 minutes, 2% B for 80 minutes, 2 to 10%  
630 B for 20 minutes, 10% B for 30 minutes, 10 to 80% B for 10 minutes, 80% B for 5 minutes, 80 to  
631 0% B for 5 minutes. Radiolabel signal was detected with a 1:2 ratio of eluate to scintillant  
632 (LabLogic, Brandon, FL) in a  $\beta$ -RAM 4 (LabLogic) and analyzed by Laura 4 software. Each

633 phosphoinositide species detected was normalized against the parent phosphatidylinositol peak as  
634 described in (Ho et al., 2016).

635

### 636 **Phagocytosis particle preparation and phagosome maturation assays**

637 pZsGreen-containing bacteria were grown at 37 °C in Lysogeny Broth (LB), supplemented with  
638 1% glucose to suppress leaky ZsGreen expression, and 100 µg/mL ampicillin (LB Growth Media).  
639 To produce ZsGreen-expressing bacteria, bacteria cultures were grown overnight in liquid LB  
640 Growth Media. The bacteria culture was then subcultured 1:100 in LB supplemented with  
641 ampicillin and without glucose (LB Expression Media) and incubated at 37 °C to mid-log growth  
642 phase. Isopropylthio-β-galactoside was added into the subculture to a final concentration of 100  
643 µM, and the subculture was incubated for another 3 hours. Bacteria were washed with PBS, then  
644 fixed with 4% PFA, and stored at 4 °C in PFA. Prior to use, fixed bacteria were washed with PBS  
645 to remove PFA.

646 RAW macrophages at 30 to 60% confluence were treated with 1 mM H<sub>2</sub>O<sub>2</sub> or 0.1% ddH<sub>2</sub>O  
647 (vehicle control) for 1 h. Subsequently,  $8.0 \times 10^7$  bacteria (0.1 OD × 1 mL) were introduced to  
648 macrophages and centrifuged at 400 x g for 5 minutes to synchronize phagocytosis. Macrophages  
649 were incubated for 20 minutes in the presence of H<sub>2</sub>O<sub>2</sub> or ddH<sub>2</sub>O before washing with PBS and  
650 incubating in media containing H<sub>2</sub>O<sub>2</sub> or ddH<sub>2</sub>O for 40 minutes. Except for PBS wash, macrophage  
651 exposure to H<sub>2</sub>O<sub>2</sub> was uninterrupted. Macrophages were washed with PBS then fixed with 4%  
652 PFA. Cells were then incubated in 1% w/v glycine to quench PFA. Cells were then blocked with  
653 1% Bovine Serum Albumin (BSA), then external bacteria were immunolabeled with rabbit anti-  
654 *E. coli* antibodies (1:100, Bio-Rad Antibodies, 4329-4906), followed by DyLight 650-conjugated  
655 donkey anti-rabbit IgG antibodies (1:1000, Bethyl Laboratories, Inc., A120-208D5). Cells were

656 then permeabilized with ice-cold methanol and blocked with 1% BSA. LAMP-1 lysosomal marker  
657 protein was immunolabeled with rat anti-LAMP-1 antibodies (1:100, 1D4B, Developmental  
658 Studies Hybridoma Bank, Iowa City, IO), followed by DyLight 550-conjugated donkey anti-rat  
659 IgG antibodies (1:1000, Bethyl Laboratories, Inc., A110-337D3). Coverslips were mounted with  
660 Dako Fluorescence Mounting Medium (Agilent, S302380-2) for imaging.

661 FIJI was used for image processing and quantitative image analysis of phagosome  
662 maturation. Internal bacteria masks were produced by applying a subtraction mask using external  
663 bacteria signal. “Noise” particles defined as being a few pixels in size were removed manually.  
664 The internal bacteria mask was converted to binary and dilated to reach the edges of the  
665 phagosomes (LAMP1 signal). LAMP-1 signal colocalized to the internal bacteria mask was  
666 analyzed cell-by-cell, and the mean LAMP-1 fluorescence intensity per cell was obtained.

667

## 668 **Statistical analysis**

669 All experiments were performed independently at least three times. Respective figure legends  
670 indicate number of cells/samples assessed, mean, standard error of mean (s.e.m.) and number of  
671 independent experiments. For analysing significant difference between various treatment groups,  
672 we used unpaired Student’s t-test when comparing two groups only or one-way ANOVA test when  
673 comparing multiple treatment conditions in non-normalized controls. Tukey’s *post hoc* test  
674 coupled to ANOVA tests was used to evaluate pairwise conditions. Statistical significance was  
675 defined as  $P > 0.05$ . Software used for analysis was GraphPad Prism 8.

676

## 677 **References**

- 678 1. Luzio JP, Rous BA, Bright NA, Pryor PR, Mullock BM, Piper RC. Lysosome-endosome  
679 fusion and lysosome biogenesis. *J Cell Sci.* 2000;113 ( Pt 9: 1515–24. Available:  
680 <http://www.ncbi.nlm.nih.gov/pubmed/10751143>
- 681 2. Luzio JP, Pryor PR, Bright NA. Lysosomes: fusion and function. *Nat Rev Mol Cell Biol.*  
682 2007;8: 622–32. doi:10.1038/nrm2217
- 683 3. Pu J, Guardia CM, Keren-Kaplan T, Bonifacino JS. Mechanisms and functions of lysosome  
684 positioning. *J Cell Sci.* Company of Biologists; 2016;129: 4329–4339.  
685 doi:10.1242/jcs.196287
- 686 4. Bissig C, Hurbain I, Raposo G, van Niel G. PIKfyve activity regulates reformation of  
687 terminal storage lysosomes from endolysosomes. *Traffic.* 2017;18: 747–757.  
688 doi:10.1111/tra.12525
- 689 5. Bright NA, Reaves BJ, Mullock BM, Luzio JP. Dense core lysosomes can fuse with late  
690 endosomes and are re-formed from the resultant hybrid organelles. *J Cell Sci.* 1997;110 ( Pt 1:  
691 2027–40. Available: <http://www.ncbi.nlm.nih.gov/pubmed/9378754>
- 692 6. Bright NA, Davis LJ, Luzio JP. Endolysosomes Are the Principal Intracellular Sites of Acid  
693 Hydrolase Activity. *Curr Biol.* Elsevier; 2016;26: 2233–45. doi:10.1016/j.cub.2016.06.046
- 694 7. Perou CM, Leslie JD, Green W, Li L, Ward DM, Kaplan J. The Beige/Chediak-Higashi  
695 syndrome gene encodes a widely expressed cytosolic protein. *J Biol Chem.* 1997;272:  
696 29790–4. Available: <http://www.ncbi.nlm.nih.gov/pubmed/9368050>
- 697 8. Bright NA, Gratian MJ, Luzio JP. Endocytic delivery to lysosomes mediated by concurrent  
698 fusion and kissing events in living cells. *Curr Biol.* 2005;15: 360–365.  
699 doi:10.1016/j.cub.2005.01.049
- 700 9. Duclos S, Corsini R, Desjardins M. Remodeling of endosomes during lysosome biogenesis  
701 involves “kiss and run” fusion events regulated by rab5. *J Cell Sci.* 2003;116: 907–18.  
702 Available: <http://www.ncbi.nlm.nih.gov/pubmed/12571288>
- 703 10. Saffi GT, Botelho RJ. Lysosome Fission: Planning for an Exit [Internet]. *Trends in Cell*  
704 *Biology.* 2019. pp. 635–646. doi:10.1016/j.tcb.2019.05.003
- 705 11. Khatter D, Raina VB, Dwivedi D, Sindhvani A, Bahl S, Sharma M. The small GTPase  
706 Arl8b regulates assembly of the mammalian HOPS complex on lysosomes. *J Cell Sci.*  
707 2015;128: 1746–61. doi:10.1242/jcs.162651
- 708 12. Wang T, Ming Z, Xiaochun W, Hong W. Rab7: Role of its protein interaction cascades in  
709 endo-lysosomal traffic [Internet]. *Cellular Signalling.* 2011. pp. 516–521.  
710 doi:10.1016/j.cellsig.2010.09.012
- 711 13. Cantalupo G, Alifano P, Roberti V, Bruni CB, Bucci C. Rab-interacting lysosomal protein  
712 (RILP): The Rab7 effector required for transport to lysosomes. *EMBO J.* 2001;20: 683–  
713 693. doi:10.1093/emboj/20.4.683
- 714 14. Pankiv S, Alemu E a., Brech A, Bruun J-AA, Lamark T, Øvervatn A, et al. FYCO1 is a  
715 Rab7 effector that binds to LC3 and PI3P to mediate microtubule plus end - Directed vesicle  
716 transport. *J Cell Biol.* 2010;188: 253–269. doi:10.1083/jcb.200907015
- 717 15. Rosa-Ferreira C, Munro S. Arl8 and SKIP Act Together to Link Lysosomes to Kinesin-1.  
718 *Dev Cell.* 2011;21: 1171–1178. doi:10.1016/j.devcel.2011.10.007
- 719 16. Khatter D, Sindhvani A, Sharma M. Arf-like GTPase Arl8: Moving from the periphery to  
720 the center of lysosomal biology. *Cell Logist.* 2015;5: e1086501.  
721 doi:10.1080/21592799.2015.1086501
- 722 17. Luzio JP, Parkinson MDJ, Gray SR, Bright NA. The delivery of endocytosed cargo to

- lysosomes. *Biochem Soc Trans.* 2009;37: 1019–1021. doi:10.1042/BST0371019
- 724 18. Cao Q, Zhong XZ, Zou Y, Murrell-Lagnado R, Zhu MX, Dong XP. Calcium release through  
725 P2X4 activates calmodulin to promote endolysosomal membrane fusion. *J Cell Biol.*  
726 2015;209: 879–894. doi:10.1083/jcb.201409071
- 727 19. Cao Q, Yang Y, Zhong XZ, Dong XP. The lysosomal Ca<sup>2+</sup>release channel TRPML1  
728 regulates lysosome size by activating calmodulin. *J Biol Chem.* 2017;292: 8424–8435.  
729 doi:10.1074/jbc.M116.772160
- 730 20. Fang X, Zhou J, Liu W, Duan X, Gala U, Sandoval H, et al. Dynamin Regulates Autophagy  
731 by Modulating Lysosomal Function. *J Genet Genomics.* 2016;43: 77–86.  
732 doi:10.1016/j.jgg.2015.10.005
- 733 21. Hong NH, Qi A, Weaver AM. PI(3,5)P2 controls endosomal branched actin dynamics by  
734 regulating cortactin-Actin interactions. *J Cell Biol.* 2015;210: 753–769.  
735 doi:10.1083/jcb.201412127
- 736 22. Renvoisé B, Chang J, Singh R, Yonekawa S, FitzGibbon EJ, Mankodi A, et al. Lysosomal  
737 abnormalities in hereditary spastic paraplegia types SPG15 and SPG11. *Ann Clin Transl*  
738 *Neurol.* 2014;1: 379–389. doi:10.1002/acn3.64
- 739 23. Rong Y, Liu M, Ma L, Du W, Zhang H, Tian Y, et al. Clathrin and phosphatidylinositol-  
740 4,5-bisphosphate regulate autophagic lysosome reformation. *Nat Cell Biol.* 2012;14: 924–  
741 934. doi:10.1038/ncb2557
- 742 24. Traub LM, Bannykh SI, Rodel JE, Aridor M, Balch WE, Kornfeld S. AP-2-containing  
743 clathrin coats assemble on mature lysosomes. *J Cell Biol.* 1996;135: 1801–14. Available:  
744 <http://www.ncbi.nlm.nih.gov/pubmed/8991092>
- 745 25. Li X, Rydzewski N, Hider A, Zhang X, Yang J, Wang W, et al. A molecular mechanism to  
746 regulate lysosome motility for lysosome positioning and tubulation. *Nat Cell Biol.* 2016;18:  
747 404–417. doi:10.1038/ncb3324
- 748 26. Yang Y, Xu M, Zhu X, Yao J, Shen B, Dong X-P. Lysosomal Ca<sup>2+</sup> release channel  
749 TRPML1 regulates lysosome size by promoting mTORC1 activity. *Eur J Cell Biol.*  
750 2019;98: 116–123. doi:10.1016/j.ejcb.2019.05.001
- 751 27. McCartney AJ, Zhang Y, Weisman LS. Phosphatidylinositol 3,5-bisphosphate: low  
752 abundance, high significance. *Bioessays.* 2014;36: 52–64. doi:10.1002/bies.201300012
- 753 28. Shisheva A, Sbrissa D, Ikononov O. Plentiful PtdIns5P from scanty PtdIns(3,5)P<sub>2</sub> or from  
754 ample PtdIns? PIKfyve-dependent models: Evidence and speculation (response to: DOI  
755 10.1002/bies.201300012). *BioEssays.* 2015;37: 267–277. doi:10.1002/bies.201400129
- 756 29. Chow CY, Zhang Y, Dowling JJ, Jin N, Adamska M, Shiga K, et al. Mutation of FIG4  
757 causes neurodegeneration in the pale tremor mouse and patients with CMT4J. *Nature.*  
758 2007;448: 68–72. doi:10.1038/nature05876
- 759 30. Choy CH, Saffi G, Gray MA, Wallace C, Dayam RM, Ou Z-YA, et al. Lysosome  
760 enlargement during inhibition of the lipid kinase PIKfyve proceeds through lysosome  
761 coalescence. *J Cell Sci.* 2018; jcs.213587. doi:10.1242/jcs.213587
- 762 31. Sbrissa D, Ikononov OC, Fu Z, Ijuin T, Gruenberg J, Takenawa T, et al. Core protein  
763 machinery for mammalian phosphatidylinositol 3,5-bisphosphate synthesis and turnover  
764 that regulates the progression of endosomal transport: Novel Sac phosphatase joins the  
765 ArPIKfyve-PIKfyve complex. *J Biol Chem.* 2007;282: 23878–23891.  
766 doi:10.1074/jbc.M611678200
- 767 32. Gopaldass N, Fauvet B, Lashuel H, Roux A, Mayer A. Membrane scission driven by the  
768 PROPPIN Atg18. *EMBO J.* 2017;36: e201796859. doi:10.15252/embj.201796859



- 769 33. Chen Y, Azad MB, Gibson SB. Superoxide is the major reactive oxygen species regulating  
770 autophagy. *Cell Death Differ.* 2009;16: 1040–1052. doi:10.1038/cdd.2009.49
- 771 34. Dizdaroglu M, Jaruga P. Mechanisms of free radical-induced damage to DNA. *Free Radic*  
772 *Res.* 2012;46: 382–419. doi:10.3109/10715762.2011.653969
- 773 35. Finkel T. From Sulfenylation to Sulfhydration: What a Thiolate Needs to Tolerate. *Sci*  
774 *Signal.* 2012;5: pe10–pe10. doi:10.1126/scisignal.2002943
- 775 36. Ristow M, Schmeisser S. Extending life span by increasing oxidative stress. *Free Radic Biol*  
776 *Med.* 2011;51: 327–336. doi:10.1016/j.freeradbiomed.2011.05.010
- 777 37. Schieber M, Chandel NS. ROS function in redox signaling and oxidative stress. *Curr Biol.*  
778 *NIH Public Access;* 2014;24: R453-62. doi:10.1016/j.cub.2014.03.034
- 779 38. Marengo B, Nitti M, Furfaro AL, Colla R, Ciucis C De, Marinari UM, et al. Redox  
780 homeostasis and cellular antioxidant systems: Crucial players in cancer growth and therapy  
781 [Internet]. *Oxidative Medicine and Cellular Longevity.* Hindawi Limited; 2016. p. 6235641.  
782 doi:10.1155/2016/6235641
- 783 39. Icha J, Weber M, Waters JC, Norden C. Phototoxicity in live fluorescence microscopy, and  
784 how to avoid it. *BioEssays.* 2017;39: 1700003. doi:10.1002/bies.201700003
- 785 40. Heinz S, Freyberger A, Lawrenz B, Schladt L, Schmuck G, Ellinger-Ziegelbauer H.  
786 Mechanistic Investigations of the Mitochondrial Complex I Inhibitor Rotenone in the  
787 Context of Pharmacological and Safety Evaluation. *Sci Rep.* Nature Publishing Group;  
788 2017;7: 45465. doi:10.1038/srep45465
- 789 41. Kamencic H, Lyon A, Paterson PG, Juurlink BHJ. Monochlorobimane Fluorometric  
790 Method to Measure Tissue Glutathione. *Anal Biochem.* 2000;286: 35–37.  
791 doi:10.1006/abio.2000.4765
- 792 42. Padgaonkar VA, Leverenz VR, Bhat A V, Pelliccia SE, Giblin FJ. Thioredoxin reductase  
793 activity may be more important than GSH level in protecting human lens epithelial cells  
794 against UVA light. *Photochem Photobiol.* NIH Public Access; 2015;91: 387–96.  
795 doi:10.1111/php.12404
- 796 43. Aldini G, Altomare A, Baron G, Vistoli G, Carini M, Borsani L, et al. N-Acetylcysteine as  
797 an antioxidant and disulphide breaking agent: the reasons why. *Free Radic Res.* 2018;52:  
798 751–762. doi:10.1080/10715762.2018.1468564
- 799 44. Lee SR, Kwon KS, Kim SR, Rhee SG. Reversible inactivation of protein-tyrosine  
800 phosphatase 1B in A431 cells stimulated with epidermal growth factor. *J Biol Chem.*  
801 1998;273: 15366–72. Available: <http://www.ncbi.nlm.nih.gov/pubmed/9624118>
- 802 45. Leslie NR, Bennett D, Lindsay YE, Stewart H, Gray A, Downes CP. Redox regulation of  
803 PI 3-kinase signalling via inactivation of PTEN. *EMBO J.* European Molecular Biology  
804 Organization; 2003;22: 5501–5510. doi:10.1093/emboj/cdg513
- 805 46. Ho CY, Choy CH, Botelho RJ. Radiolabeling and Quantification of Cellular Levels of  
806 Phosphoinositides by High Performance Liquid Chromatography-coupled Flow  
807 Scintillation. *J Vis Exp.* 2016; e53529–e53529. doi:10.3791/53529
- 808 47. Weaver BA. How Taxol/paclitaxel kills cancer cells. *Mol Biol Cell.* American Society for  
809 Cell Biology; 2014;25: 2677–81. doi:10.1091/mbc.E14-04-0916
- 810 48. Maejima I, Takahashi A, Omori H, Kimura T, Takabatake Y, Saitoh T, et al. Autophagy  
811 sequesters damaged lysosomes to control lysosomal biogenesis and kidney injury. *EMBO*  
812 *J.* *EMBO J;* 2013;32: 2336–2347. doi:10.1038/emboj.2013.171
- 813 49. Chauhan S, Kumar S, Jain A, Ponpuak M, Mudd MH, Kimura T, et al. TRIMs and Galectins  
814 Globally Cooperate and TRIM16 and Galectin-3 Co-direct Autophagy in Endomembrane

- 815 Damage Homeostasis. *Dev Cell*. 2016;39: 13–27. doi:10.1016/j.devcel.2016.08.003
- 816 50. Dong X, Shen D, Wang X, Dawson T, Li X, Zhang Q, et al. PI(3,5)P(2) controls membrane  
817 trafficking by direct activation of mucolipin Ca(2+) release channels in the endolysosome.  
818 *Nat Commun*. 2010;1: 38. doi:10.1038/ncomms1037
- 819 51. Zhang X, Cheng X, Yu L, Yang J, Calvo R, Patnaik S, et al. MCOLN1 is a ROS sensor in  
820 lysosomes that regulates autophagy. *Nat Commun*. 2016;7: 12109.  
821 doi:10.1038/ncomms12109
- 822 52. Dayam RM, Saric A, Shilliday RE, Botelho RJ. The Phosphoinositide-Gated Lysosomal  
823 Ca<sup>2+</sup> Channel, TRPML1, Is Required for Phagosome Maturation. *Traffic*. 2015;16: 1010–  
824 1026. doi:10.1111/tra.12303
- 825 53. Gee KR, Brown KA, Chen WNU, Bishop-Stewart J, Gray D, Johnson I. Chemical and  
826 physiological characterization of fluo-4 Ca<sup>2+</sup>-indicator dyes. *Cell Calcium*. Elsevier Ltd;  
827 2000;27: 97–106. doi:10.1054/ceca.1999.0095
- 828 54. Boutry M, Branchu J, Lustremant C, Pujol C, Pernelle J, Matusiak R, et al. Inhibition of  
829 Lysosome Membrane Recycling Causes Accumulation of Gangliosides that Contribute to  
830 Neurodegeneration. *Cell Rep*. 2018;23: 3813–3826. doi:10.1016/j.celrep.2018.05.098
- 831 55. Elkin SR, Oswald NW, Reed DK, Mettlen M, MacMillan JB, Schmid SL. Ikarugamycin: A  
832 Natural Product Inhibitor of Clathrin-Mediated Endocytosis. *Traffic*. Blackwell  
833 Munksgaard; 2016;17: 1139–1149. doi:10.1111/tra.12425
- 834 56. Von Kleist L, Stahlschmidt W, Bulut H, Gromova K, Puchkov D, Robertson MJ, et al. Role  
835 of the clathrin terminal domain in regulating coated pit dynamics revealed by small  
836 molecule inhibition. *Cell*. Cell Press; 2011;146: 471–484. doi:10.1016/j.cell.2011.06.025
- 837 57. Hoyer MJ, Chitwood PJ, Ebmeier CC, Striepen JF, Qi RZ, Old WM, et al. A Novel Class  
838 of ER Membrane Proteins Regulates ER-Associated Endosome Fission. *Cell*. 2018;175:  
839 254-265.e14. doi:10.1016/j.cell.2018.08.030
- 840 58. Bissig C, Croisé P, Heiligenstein X, Hurbain I, Lenk GM, Kaufman E, et al. The PIKfyve  
841 complex regulates the early melanosome homeostasis required for physiological amyloid  
842 formation. *J Cell Sci*. 2019;132: jcs229500. doi:10.1242/jcs.229500
- 843 59. Hasegawa J, Iwamoto R, Otomo T, Nezu A, Hamasaki M, Yoshimori T. Autophagosome-  
844 lysosome fusion in neurons requires INPP5E, a protein associated with Joubert syndrome.  
845 *EMBO J*. European Molecular Biology Organization; 2016;35: 1853–67.  
846 doi:10.15252/embj.201593148
- 847 60. Krajcovic M, Krishna S, Akkari L, Joyce JA, Overholtzer M. mTOR regulates phagosome  
848 and entotic vacuole fission. Klumperman J, editor. *Mol Biol Cell*. 2013;24: 3736–3745.  
849 doi:10.1091/mbc.E13-07-0408
- 850 61. Gan Q, Wang X, Zhang Q, Yin Q, Jian Y, Liu Y, et al. The amino acid transporter SLC-  
851 36.1 cooperates with PtdIns3P 5-kinase to control phagocytic lysosome reformation. *J Cell*  
852 *Biol*. Rockefeller University Press; 2019;218: 2619–2637. doi:10.1083/JCB.201901074
- 853 62. Cooke FT, Dove SK, McEwen RK, Painter G, Holmes a B, Hall MN, et al. The stress-  
854 activated phosphatidylinositol 3-phosphate 5-kinase Fab1p is essential for vacuole function  
855 in *S. cerevisiae*. *Curr Biol*. 1998;8: 1219–22. doi:10.1016/S0960-9822(07)00513-1
- 856 63. Jin N, Jin Y, Weisman LS. Early protection to stress mediated by CDK-dependent PI3,5P  
857 2 signaling from the vacuole/lysosome. *J Cell Biol*. Rockefeller University Press; 2017;216:  
858 2075–2090. doi:10.1083/jcb.201611144
- 859 64. Mackeh R, Lorin S, Ratier A, Mejdoubi-Charef N, Baillet A, Bruneel A, et al. Reactive  
860 oxygen species, AMP-activated protein kinase, and the transcription cofactor p300 regulate

- 861  $\alpha$ -tubulin acetyltransferase-1 ( $\alpha$ TAT-1/MEC-17)-dependent microtubule hyperacetylation  
862 during cell stress. *J Biol Chem. American Society for Biochemistry and Molecular Biology*;  
863 2014;289: 11816–28. doi:10.1074/jbc.M113.507400
- 864 65. Debattisti V, Gerencser AA, Saotome M, Das S, Hajnóczky G. ROS Control Mitochondrial  
865 Motility through p38 and the Motor Adaptor Miro/Trak. *Cell Rep. Elsevier B.V.*; 2017;21:  
866 1667–1680. doi:10.1016/j.celrep.2017.10.060
- 867 66. Valen G, Sondén A, Vaage J, Malm E, Kjellström BT. Hydrogen peroxide induces  
868 endothelial cell atypia and cytoskeleton depolymerization. *Free Radic Biol Med. Elsevier*  
869 *Inc.*; 1999;26: 1480–1488. doi:10.1016/S0891-5849(99)00009-X
- 870 67. Friedman JR, DiBenedetto JR, West M, Rowland AA, Voeltz GK. Endoplasmic reticulum-  
871 endosome contact increases as endosomes traffic and mature. Hegde RS, editor. *Mol Biol*  
872 *Cell*. 2013;24: 1030–1040. doi:10.1091/mbc.E12-10-0733
- 873 68. Rowland AA, Chitwood PJ, Phillips MJ, Voeltz GK. ER contact sites define the position  
874 and timing of endosome fission. *Cell*. 2014;159: 1027–1041.  
875 doi:10.1016/j.cell.2014.10.023
- 876 69. Korge P, Calmettes G, Weiss JN. Increased reactive oxygen species production during  
877 reductive stress: The roles of mitochondrial glutathione and thioredoxin reductases.  
878 *Biochim Biophys Acta. NIH Public Access*; 2015;1847: 514–25.  
879 doi:10.1016/j.bbabbio.2015.02.012
- 880 70. Nordberg J, Zhong L, Holmgren A, Arnér ES. Mammalian thioredoxin reductase is  
881 irreversibly inhibited by dinitrohalobenzenes by alkylation of both the redox active  
882 selenocysteine and its neighboring cysteine residue. *J Biol Chem. American Society for*  
883 *Biochemistry and Molecular Biology*; 1998;273: 10835–42.  
884 doi:10.1074/JBC.273.18.10835
- 885 71. Ochi R, Dhagia V, Lakhkar A, Patel D, Wolin MS, Gupte SA. Rotenone-stimulated  
886 superoxide release from mitochondrial complex I acutely augments L-type  $Ca^{2+}$  current in  
887 A7r5 aortic smooth muscle cells. *Am J Physiol Circ Physiol*. 2016;310: H1118–H1128.  
888 doi:10.1152/ajpheart.00889.2015
- 889 72. Lubos E, Loscalzo J, Handy DE. Glutathione peroxidase-1 in health and disease: From  
890 molecular mechanisms to therapeutic opportunities [Internet]. *Antioxidants and Redox*  
891 *Signaling. Mary Ann Liebert, Inc.*; 2011. pp. 1957–1997. doi:10.1089/ars.2010.3586
- 892 73. Brown DI, Griendling KK. Nox proteins in signal transduction [Internet]. *Free Radical*  
893 *Biology and Medicine. Free Radic Biol Med*; 2009. pp. 1239–1253.  
894 doi:10.1016/j.freeradbiomed.2009.07.023
- 895 74. Aguet F, Antonescu CN, Mettlen M, Schmid SL, Danuser G. Advances in analysis of low  
896 signal-to-noise images link dynamin and AP2 to the functions of an endocytic checkpoint.  
897 *Dev Cell*. 2013;26: 279–291. doi:10.1016/j.devcel.2013.06.019
- 898 75. Hofmann I. An N-terminally acetylated Arf-like GTPase is localised to lysosomes and  
899 affects their motility. *J Cell Sci*. 2006;119: 1494–1503. doi:10.1242/jcs.02958

900  
901  
902

## 903 **Figure legends**

904

905 **Figure 1: Different ROS inducers produce different ROS in RAW macrophages.** (A) RAW  
906 cells were exposed to vehicle, or to one of the following ROS inducers – 1 mM H<sub>2</sub>O<sub>2</sub> 40 min, 1  
907 μM rotenone 60 min, 10 μM CDNB 30 min, or 5 μM MCB 30 min. Cells were then stained with  
908 CellROX Green to detect and quantify the levels of ROS formed during these treatments.  
909 Fluorescence micrographs represent single z-focal plane images from spinning disc confocal  
910 microscopy. Scale bar = 20 μm. (B) Quantification of CellROX Green fluorescence intensity. C)  
911 MCB-GSH adduct was also detected during vehicle or MCB treatment. Fluorescence  
912 micrographs represent single z-focal plane images from spinning disc confocal microscopy.  
913 Scale bar = 20 μm. (D) Quantification of MCB-GSH fluorescence intensity. E-H: Quantification  
914 of ROS-specific probes, where HPF detects hydroxyl and perinitrite (E), Si-DMA detects singlet  
915 oxygen (F), Mitosox detects mitochondrial superoxide (G), and ROS-ID detects cytoplasmic  
916 superoxide (H). For each ROS probe, fluorescence was normalized against the respective vehicle  
917 control. For all graphs, data are represented as mean ± S.E.M. from three independent  
918 experiments with 40-50 cells assessed per treatment condition per experiment. One-way  
919 ANOVA and Tukey's *post-hoc* test were used for (B, E-H), and an unpaired Student's t-test  
920 performed for (D). \* indicates p<0.05.

921  
922  
923 **Figure 2. ROS agonists prevent lysosome enlargement during acute PIKfyve suppression.** A:  
924 RAW cells pre-labelled with Lucifer yellow and exposed to vehicle or 20 nM apilimod for 40 min.  
925 These conditions were then supplemented with additional vehicle or 1 mM H<sub>2</sub>O<sub>2</sub> for 40 min, 1 μM  
926 rotenone for 60 min, 10 μM CDNB for 30 min, 5 μM MCB for 30 min or auranofin 10 μM for  
927 120 min. Fluorescence micrographs are represented as z-projections of 45-55 z-plane images  
928 obtained by spinning disc microscopy. Scale bar: 5 μm. B-D: Quantification of individual

929 lysosome volume (B), lysosome number per cell (C), and total lysosome volume per cell (D). Data  
930 represent mean  $\pm$  S.E.M. from three independent experiments, with 25-30 cells assessed per  
931 treatment condition per experiment. One-way ANOVA and Tukey's *post-hoc* test was used, where  
932 \* indicates statistical significance between indicated conditions ( $p < 0.05$ ).

933

934 **Figure 3. ROS scavengers permit lysosome coalescence during acute PIKfyve suppression.**

935 A: RAW cells pre-labelled with Lucifer yellow and exposed to vehicle, or 0.5  $\mu$ M rotenone 60  
936 min, or 10 mM N-acetyl-L-cysteine (NAC) 120 min alone, or in presence of 20 nM apilimod for  
937 the last 40 min. Fluorescence micrographs are represented as z-projections of 45-55 z-plane images  
938 obtained by spinning disc microscopy. Scale bar: 5  $\mu$ m. B-D: Quantification of individual  
939 lysosome volume (B), lysosome number per cell (C), and total lysosome volume per cell (D). Data  
940 represent mean  $\pm$  S.E.M. from three independent experiments, with 25-30 cells assessed per  
941 treatment condition per experiment. One-way ANOVA and Tukey's *post-hoc* test was used, where  
942 \* indicates statistical significance between indicated conditions ( $p < 0.05$ ).

943

944 **Figure 4: ROS accelerate recovery of lysosome size and number upon PIKfyve reactivation.**

945 (A) Top two rows: RAW cells pre-labelled with Lucifer yellow were exposed to either vehicle, 1  
946 mM H<sub>2</sub>O<sub>2</sub> 40 min, 1  $\mu$ M rotenone 60 min, 10  $\mu$ M CDNB 30 min, or 5  $\mu$ M MCB 30 min. Bottom  
947 two rows: alternatively, RAW cells were first treated with 20 nM apilimod for 60 min (0 h),  
948 followed by apilimod removal and replenishment with complete media for 2 h in the presence of  
949 vehicle, H<sub>2</sub>O<sub>2</sub>, rotenone, CDNB, or MCB at previously indicated concentrations. Fluorescence  
950 micrographs are spinning disc microscopy images with 45-55 z-planes represented as z-  
951 projections. Scale bar: 5  $\mu$ m. (B-D) Quantification of individual lysosome volume (B), lysosome

952 number per cell (C), and total lysosome volume per cell (D). Data are represented as mean  $\pm$  s.e.m.  
953 from three independent experiments, with 25-30 cell assessed per treatment condition per  
954 experiment. One-way ANOVA and Tukey's *post-hoc* test used for B-D, where \* indicates  
955 statistically significant difference between control conditions ( $P < 0.05$ ).

956

957

958 **Figure 5: Apilimod integrity and PtdIns(3,5)P<sub>2</sub> levels are not altered by ROS.** (A) RAW cells  
959 pre-labelled with Lucifer yellow. Following reactions were performed in complete media in vitro  
960 for designated time, prior to adding to cells for an additional 40 min: vehicle; 1 mM H<sub>2</sub>O<sub>2</sub> 40 min;  
961 20 nM apilimod 40 min; 20 nM apilimod preincubated with 1 mM H<sub>2</sub>O<sub>2</sub> for 40 min; 20 nM  
962 apilimod preincubated with 0.5 mg/L catalase for 60 min; 1 mM H<sub>2</sub>O<sub>2</sub> exposed to 0.5 mg/L catalase  
963 for 60 min to neutralize H<sub>2</sub>O<sub>2</sub>, followed by 20 nM apilimod 40 min; or 20 nM apilimod exposed  
964 to 1 mM H<sub>2</sub>O<sub>2</sub> for 40 min to test whether H<sub>2</sub>O<sub>2</sub> degraded apilimod, followed by 0.5 mg/L catalase  
965 for 60 min to degrade H<sub>2</sub>O<sub>2</sub>. Fluorescence micrographs are spinning disc microscopy images with  
966 45-55 z-planes represented as z-projections. Scale bar: 5  $\mu$ m. (B-D) Quantification of individual  
967 lysosome volume (B), lysosome number per cell (C), and total lysosome volume per cell (D). AP  
968 (apilimod), CAT (catalase). Data are shown as mean  $\pm$  s.e.m. from three independent experiments,  
969 with 25-30 cell assessed per treatment condition per experiment. One-way ANOVA and Tukey's  
970 *post-hoc* test used for B-D; \* indicates statistical difference against control condition ( $P < 0.05$ ). (E-  
971 F) <sup>3</sup>H-*myo*-inositol incorporation followed by HPLC-coupled flow scintillation used to determine  
972 PtdIns(3)P and PtdIns(3,5)P<sub>2</sub> levels from RAW cells exposed to vehicle alone, or 1 mM H<sub>2</sub>O<sub>2</sub> 40  
973 min (E), or 1  $\mu$ M rotenone 60 min (F), in presence or absence of 20 nM apilimod. Data represent

974  $\pm$  s.d. from three independent experiments. One-way ANOVA and Tukey's *post-hoc* test used for  
975 E-F; \* indicates statistical difference against control condition ( $P < 0.05$ ).

976

977 **Figure 6. ROS agents differentially affect the microtubule system.** Representative single z-  
978 focal plane immunofluorescence micrographs of RAW cells (A) or RPE cells (E) treated with  
979 vehicle, H<sub>2</sub>O<sub>2</sub>, rotenone, CDNB or MCB at previously used time periods and at the indicated  
980 concentrations. After treatment with ROS agents, cells were fixed and immunostained with anti-  
981  $\alpha$ -tubulin antibodies. Quantification of number of microtubule junctions per cell, number of  
982 microtubule branches per cell and average microtubule branch length respectively for RAW cells  
983 (B-D) and RPE cells (F-H), and patch area in RPE cells (I). Data are represented as mean  $\pm$  SEM  
984 from three independent experiments, with 50-70 cells assessed per treatment per experiment for  
985 RAW cells (A-D) and 15-20 cells assessed per treatment per experiment for RPE cells (E-I). One-  
986 way ANOVA and Tukey's *post-hoc* test used for B-D and F-I, where \* indicates statistically  
987 significant difference between control conditions ( $P < 0.05$ ). Scale bar: 10  $\mu$ m (A) or 20  $\mu$ m (E).

988

989 **Figure 7: Distinct ROS agents differentially impact lysosome motility.** RAW cells (A-C,  
990 Movies 1-6) or RPE cells (D-F, Movies 7-13) were pre-labelled with Lucifer yellow and exposed  
991 to either vehicle, 1 mM H<sub>2</sub>O<sub>2</sub> 40 min, 1  $\mu$ M rotenone 60 min, 10  $\mu$ M CDNB 30 min, 5  $\mu$ M MCB  
992 30 min, or 5  $\mu$ M or 10  $\mu$ M nocodazole for 60 min. Live-cell spinning disc confocal microscopy  
993 was performed at a single, mid-cell z-focal plane once every 4 sec for 3 min for RAW cells or  
994 every 8 sec for 6 min for RPE cells. Quantification of lysosome speed (A, D), lysosome track  
995 length (B, E), and lysosome displacement (C,F) for RAW cells (A-C) or RPE cells (D-F). Data are  
996 represented as mean  $\pm$  s.d. from three independent experiments. One-way ANOVA and Tukey's

997 *post-hoc* test used for B-D, where \* indicates  $P < 0.05$  between indicated conditions and control.  
998 Supplemental Movies 1-13 are representative of the live-cell imaging from which shown data was  
999 derived from.

1000

1001 **Figure 8: H<sub>2</sub>O<sub>2</sub> hinders phagosome-lysosome fusion.** (A) RAW cells were treated with H<sub>2</sub>O<sub>2</sub> or  
1002 vehicle (H<sub>2</sub>O) for 1h before introducing ZsGreen-expressed *E. coli* (green). RAW cells were  
1003 incubated for 20 minutes in the presence of bacteria and H<sub>2</sub>O<sub>2</sub> or vehicle, then RAW cells were  
1004 washed with PBS, and further incubated in media containing H<sub>2</sub>O<sub>2</sub> or vehicle for an additional 40  
1005 minutes. External bacteria were labeled with rabbit anti-*E. coli* antibodies (blue) and were  
1006 excluded from analysis using a mask. LAMP-1 was labeled with rat anti-LAMP-1 antibodies (red).  
1007 (B) Quantification of mean LAMP-1 intensity on bacteria-containing phagosomes. LAMP-1  
1008 intensities were quantified from regions that co-localized to internal bacteria (green signal and no  
1009 blue signal). Data represented as a scatter plot, where each dot is an individual phagosome from  $n$   
1010 = 144 to 179 cells across all independent experiments and conditions. Mean  $\pm$  standard deviation  
1011 from three independent experiments is indicated as well. Data analyzed with two-tailed unpaired  
1012 t-test (\* indicates  $p < 0.05$ ).

1013

1014 **Figure 9: H<sub>2</sub>O<sub>2</sub> and rotenone do not induce lysosome damage as detected by galectin-3 puncta.**  
1015 (A). Macrophages expressing galectin-3-GFP were labelled with Alexa546-conjugated dextran  
1016 and then exposed to vehicle, rotenone, or H<sub>2</sub>O<sub>2</sub> for ~ 1 h, or with LLOMe for 2 h as a positive  
1017 control. Live-cell imaging was done by spinning disc confocal. Scale bar = 10  $\mu$ m. (B) Mean  
1018 number of galectin-3-GFP puncta per cell based on 25-30 cells per condition per experiment from



1019 n=3 independent experiments. One-way ANOVA and Tukey's *post-hoc* test was used, where \*  
1020 indicates  $P < 0.05$  in relation to vehicle condition and ns indicates not significant.

1021

1022 **Figure 10: ROS regulate lysosome coalescence independently of  $\text{Ca}^{2+}$ .** (A) RAW cells were  
1023 pre-labelled with Alexa546-conjugated dextran, followed by labelling with the  $\text{Ca}^{2+}$  sensor, Fluo4-  
1024 AM. Cells were treated with vehicle, or 1 mM  $\text{H}_2\text{O}_2$  for 40 min, or 1  $\mu\text{M}$  rotenone for 60 min.  
1025 Fluorescence micrographs represent single z-plane images obtained by spinning disc microscopy.  
1026 Scale bar: 5  $\mu\text{m}$ . (B) Ratio of Fluo4-AM fluorescence intensities associated with Alexa<sup>546</sup>-  
1027 conjugated dextran and cytosol. Data are represented as mean  $\pm$  SEM from three independent  
1028 experiments, with 20-25 cells assessed per treatment per experiment. Two-way ANOVA and  
1029 Tukey's *post-hoc* test were used for (B), where \* indicates  $P < 0.05$  against control conditions. (C)  
1030 RAW cells were pre-labelled with Lucifer yellow and exposed to either vehicle, 1 mM  $\text{H}_2\text{O}_2$  for  
1031 40 min, 1  $\mu\text{M}$  rotenone for 60 min, or 50  $\mu\text{M}$  BAPTA-AM for 70 min, with or without 20 nM  
1032 apilimod. Additionally, cells were co-treated with BAPTA-AM and  $\text{H}_2\text{O}_2$  or BAPTA-AM and  
1033 rotenone, before adding apilimod. Fluorescence micrographs are spinning disc microscopy images  
1034 with 45-55 z-planes represented as z-projections. Scale bar: 5  $\mu\text{m}$ . (D-F) Quantification of  
1035 individual lysosome volume (D), lysosome number per cell (E), and total lysosome volume per  
1036 cell (F). Data is illustrated as mean  $\pm$  SEM from three independent experiments, with 25-30 cell  
1037 assessed per condition per experiment. One-way ANOVA and Tukey's *post-hoc* test used for B-  
1038 D with \* $P < 0.05$  compared to indicated control conditions.

1039

1040 **Figure 11: Clathrin inhibition does not arrest ROS-mediated lysosome fragmentation during**  
1041 **PIKfyve reactivation.** (A) RAW cells were pre-labelled with Lucifer yellow and exposed to either

1042 vehicle alone, 1 mM H<sub>2</sub>O<sub>2</sub> for 40 min, 1 μM ikarugamycin for 1 h, or 20 nM apilimod for 60 min.  
1043 For a subgroup of cells treated with apilimod, drug was replaced with fresh media containing either  
1044 vehicle, 1 mM H<sub>2</sub>O<sub>2</sub>, 1 μM ikarugamycin, or 1 mM H<sub>2</sub>O<sub>2</sub> and 1 μM ikarugamycin for 2 h.  
1045 Fluorescence micrographs are spinning disc microscopy images with 45-55 z-planes represented  
1046 as z-projections. Scale bar: 5 μm. (B-D) Quantification of individual lysosome volume (B),  
1047 lysosome number per cell (C), and total lysosome volume per cell (D). Data are shown as mean ±  
1048 s.e.m. from three independent experiments, with 25-30 cell assessed per treatment condition per  
1049 experiment. One-way ANOVA and Tukey's *post-hoc* test used for B-D, where \* indicates  $P < 0.05$   
1050 between experimental and control conditions.

1051  
1052 **Figure 12: ROS promote actin clearance from lysosomes and actin depolymerization abates**  
1053 **lysosomes coalescence during PIKfyve inhibition.** (A) RAW cells pre-labelled with Alexa<sup>488</sup>-  
1054 conjugated dextran followed by treatment with vehicle, 20 nM apilimod for 40 min alone, or in  
1055 presence of 10 μM CDNB for 30 min or 1 μM rotenone for 60 min. Cells were fixed with 4% PFA  
1056 and stained for actin with phalloidin. Fluorescence micrographs were captured by spinning disc  
1057 confocal as single z-planes. The inset is a magnified portion of field of view tracking Alexa<sup>488</sup>-  
1058 conjugated dextran lysosome(s), phalloidin-stained actin, and as merged channels. Scale bar: 2  
1059 μm. (B) Cells were assessed for number of actin puncta structures associated with lysosomes. Data  
1060 represent mean ± S.E.M. from three independent experiments, with 60-80 cells assessed per  
1061 treatment condition across three experiments. One-way ANOVA and Tukey's *post-hoc* test was  
1062 used, where \* indicates statistical significance between indicated conditions ( $p < 0.05$ ). (C) RAW  
1063 cells were pre-labelled with Lucifer yellow and exposed to vehicle or 20 nM apilimod for 1 h,  
1064 followed by apilimod removal at 0 or 2 h. These conditions were then supplemented with

1065 additional vehicle or 1  $\mu$ M latrunculin A or 5  $\mu$ M cytochalasin B for 1 h. Fluorescence micrographs  
1066 are represented as z-projections of 45-55 z-plane images obtained by spinning disc confocal  
1067 microscopy. Scale bar: 5  $\mu$ m. D-F: Quantification of individual lysosome volume (D), lysosome  
1068 number per cell (E), and total lysosome volume per cell (F). Data represent mean  $\pm$  S.E.M. from  
1069 three independent experiments, with 25-30 cells assessed per treatment condition per experiment.  
1070 One-way ANOVA and Tukey's *post-hoc* test was used, where \* indicates statistical significance  
1071 between indicated conditions ( $p < 0.05$ ).

1072

## 1073 **Supplemental Materials**

1074 **Supplemental Figure S1: Lower H<sub>2</sub>O<sub>2</sub> concentration prevents apilimod induced lysosome**  
1075 **coalescence.** (A) RAW cells were pre-labelled with Lucifer yellow and exposed to either vehicle,  
1076 100  $\mu$ M H<sub>2</sub>O<sub>2</sub> for 40 min in presence or absence of 1 nM or 5 nM apilimod 40 min. Scale bar: 5  
1077  $\mu$ m. (B-D) Quantification of individual lysosome volume (B), lysosome number per cell (C), and  
1078 total lysosome volume per cell (D). Data are illustrated as mean  $\pm$  SEM from three independent  
1079 experiments, with 25-30 cell assessed per condition per experiment. One-way ANOVA and  
1080 Tukey's *post-hoc* test was used, where \* indicates  $P < 0.05$  for the indicated conditions.

1081

1082 **Supplemental Figure S2: ROS prevent lysosome enlargement during acute PIKfyve**  
1083 **suppression in HeLa and RPE cells.** (A) HeLa cells pre-labelled with Lucifer yellow and exposed  
1084 to vehicle or 100 nM apilimod 40 min, or with 1 mM H<sub>2</sub>O<sub>2</sub> in the presence or absence of 100 nM  
1085 apilimod for 40 min. Scale bar: 10  $\mu$ m. (B-D) Quantification of individual lysosome volume per  
1086 lysosome (B), lysosome number per cell (C), and total lysosome volume per cell (D). (E) RPE  
1087 cells pre-labelled with Lucifer yellow and exposed to vehicle, or 1 mM H<sub>2</sub>O<sub>2</sub>, or 10  $\mu$ M CDNB,

1088 in presence or absence of 200 nM apilimod 40 min. Scale bar: 20  $\mu$ m. (F-H) Quantification of  
1089 individual lysosome volume (F), lysosome number per cell (G), and sum lysosome volume per  
1090 cell (H). For (B-D) and (F-H), data are represented as mean  $\pm$  SEM. from three independent  
1091 experiments, with 25-30 cells assessed for (B-D) and 15-20 cells assessed for (F-H) per treatment  
1092 condition per experiment. One-way ANOVA and Tukey's *post-hoc* test used with \* $P$ <0.05  
1093 compared to indicated control conditions.

1094

1095 **Supplemental Figure S3: Quantification and validation of microtubule morphology by image**

1096 **analysis.** Single z-focal plane immunofluorescence micrographs of RAW cells (A) or RPE cells  
1097 (E) treated with vehicle, H<sub>2</sub>O<sub>2</sub> or rotenone. After treatment with ROS agents, cells were fixed and  
1098 immunostained with anti- $\alpha$ -tubulin antibodies. Cells were analyzed for their microtubule  
1099 morphology using the ImageJ "skeleton" plugin, converting images into binary "skeleton"  
1100 micrographs. Quantification of number of microtubule junctions per cell, number of microtubule  
1101 branches per cell and average microtubule branch length for RAW cells (B-D) and RPE cells (F-  
1102 H). RPE cells were also analyzed for maximum microtubule patch area per cell (I) through ImageJ  
1103 using binary filter and watershed segmentation. Data are represented as mean  $\pm$  SD from 5  
1104 different fields of view for RAW cells or 10 different fields of view for RPE cell, with 50-70 cells  
1105 assessed per treatment condition for RAW cells (A-D) and 15-20 cells assessed per treatment  
1106 condition for RPE cells (E-H). One-way ANOVA and Tukey's *post-hoc* test used for B-D and F-  
1107 H, where \* indicates statistically significant difference between control conditions ( $P$ <0.05). Scale  
1108 bar: 20  $\mu$ m (A, E).

1109

1110 **Supplemental Figure S4: Increased microtubule stability does not affect lysosome motility**  
1111 **or lysosome coalescence during PIKfyve inhibition.** (A) RAW cells pre-labelled with Lucifer  
1112 yellow were exposed to either vehicle, or 1  $\mu$ M or 10  $\mu$ M paclitaxel for 60 min in presence or  
1113 absence of 20 nM apilimod for the remaining 40 min. Scale bar: 5  $\mu$ m. (B-D) Quantification of  
1114 individual lysosome volume (B), lysosome number per cell (C), and total lysosome volume per  
1115 cell (D). Data are represented as mean  $\pm$  s.e.m. from three independent experiments, with 25-30  
1116 cell assessed for (B-D) per treatment condition per experiment. (E-G) RAW cells pre-labelled with  
1117 Lucifer yellow were exposed to vehicle or 1  $\mu$ M or 10  $\mu$ M paclitaxel 60 min. Live cell spinning  
1118 disc confocal microscopy was performed at single z-focal plane once every 4 sec for 3 min.  
1119 Quantification of lysosome speed (E), lysosome displacement (F), and lysosome track length (G)  
1120 are shown. Data are represented as mean  $\pm$  s.d. from three independent experiments. One-way  
1121 ANOVA and Tukey's *post-hoc* tests were used, where \* indicates  $P < 0.05$  between experimental  
1122 and control conditions. Data is based on movies like those represented by Movies 14-16.

1123  
1124 **Supplemental Figure S5. ROS do not affect Rab7 activation and Arl8b loading onto**  
1125 **lysosomes.** RAW cells expressing RILPC33-GFP (A), or Arl8bWT-GFP (B), exposed to vehicle  
1126 in absence or presence of 20 nM apilimod 40 min, or 1 mM H<sub>2</sub>O<sub>2</sub> 40 min in presence or absence  
1127 of 20 nM apilimod 40 min. Scale bar: 5  $\mu$ m. (C-D) Quantification of membrane associated  
1128 fluorescence intensity of RILPC33-GFP (C) from (A) or Arl8bWT-GFP (D) from (B), normalized  
1129 to cytosol fluorescence intensity. Data represent mean  $\pm$  SEM from three independent experiments,  
1130 with 15-20 cell assessed per treatment condition per experiment. One-way ANOVA and Tukey's  
1131 *post-hoc* test used for C-D with \* $P < 0.05$  compared to indicated control conditions. (E) A  
1132 representative Western blot of membrane fractions from RAW macrophages treated with vehicle,

1133 rotenone, or H<sub>2</sub>O<sub>2</sub> with or without apilimod. Blots were probed with antibodies against Rab7,  
1134 Arl8a/b, and LAMP1, the latter used to benchmark membrane levels. (F) Relative levels of  
1135 Arl8ab/b or Rab7 as a ratio to LAMP1 band intensity. Data are shown as mean + standard deviation  
1136 from n=3 independent experiments.

1137

1138 **Supplemental Figure S6. H<sub>2</sub>O<sub>2</sub> boosts recruitment of clathrin and dynamin to membranes.**

1139 (A) RPE cells stably expressing clathrin heavy chain-eGFP were pre-labelled with Alexa<sup>546</sup>-  
1140 conjugated dextran and treated with vehicle, 1 mM H<sub>2</sub>O<sub>2</sub>, or 200 nM apilimod with or without 1  
1141 mM H<sub>2</sub>O<sub>2</sub>. Single z- plane images were acquired every 2 min for 40 min across all treatments.  
1142 Fluorescence micrographs represent single z-plane images at 0 min and 40 min for each treatment  
1143 obtained by spinning disc microscopy. The inset is a magnified portion of field of view tracking  
1144 Alexa<sup>546</sup>-conjugated dextran lysosome(s) or clathrin-eGFP separate or merged. Scale bar: 7 μm.  
1145 B. Ratio of clathrin-eGFP fluorescence intensities associated with Alexa<sup>546</sup>-conjugated dextran  
1146 and cytosol time points: 0, 10, 20, 30, and 40 min. Data are represented as mean ± s.e.m. from five  
1147 to six independent experiments, with 1-3 cells assessed per treatment condition per experiment.  
1148 Two-way ANOVA and Tukey's *post-hoc* test were used for (B), where \* indicates  $P<0.05$  against  
1149 control conditions. (C) RAW cells were treated with vehicle or 1 mM H<sub>2</sub>O<sub>2</sub> for 40 min, lysed and  
1150 homogenates fractionated through a sucrose gradient ultracentrifugation. Fractions were  
1151 immunoblotted against LAMP1 and VAPB to respectively identify lysosome and ER fractions,  
1152 and against clathrin heavy chain and dynamin 2. Protein expression for clathrin heavy chain (D) or  
1153 dynamin 2 (E) were normalized to LAMP1 for fractions 3 to 6. Data are represented as mean ±  
1154 s.d. from three independent experiments. Unpaired Student's t-test was used for (D-E), where \*  
1155 indicates  $P<0.05$  against vehicle control conditions.

1156

1157 **Supplemental Figure S7. Dynamin inhibition does not affect lysosome fragmentation during**

1158 **during PIKfyve reactivation.** (A) RAW cells were pre-labelled with Lucifer yellow and exposed

1159 to either vehicle, 30  $\mu$ M dyngo-4A for 2 h, 1 mM H<sub>2</sub>O<sub>2</sub> for 40 min, or 1  $\mu$ M rotenone for 1 h, or

1160 20 nM apilimod for 60 min. Additional subgroup of apilimod treated cells were then washed and

1161 incubated with apilimod-free media and changed for 2 h in the presence of vehicle, dyngo-4A,

1162 H<sub>2</sub>O<sub>2</sub>, and dyngo4-A plus H<sub>2</sub>O<sub>2</sub> for a total time of 2 h without apilimod. Fluorescence

1163 micrographs are spinning disc microscopy images with 45-55 z-planes represented as z-

1164 projections. Scale bar: 5  $\mu$ m. (B-D) Quantification of individual lysosome volume (B), lysosome

1165 number per cell (C), and total lysosome volume per cell (D). Data is illustrated as mean  $\pm$  s.e.m.

1166 from three independent experiments, with 25-30 cell assessed per treatment condition per

1167 experiment. One-way ANOVA and Tukey's *post-hoc* test used for B-D with \**P*<0.05 compared

1168 to indicated control conditions.

1169

1170

1171

1172

1173

1174

1175 **Supplemental Movie 1: Lysosome motility for vehicle-treated RAW macrophages.** Live-cell

1176 imaging of RAW macrophages pre-labelled with Lucifer yellow and treated with vehicle-only.

1177 Single-plane acquired every 4 sec for 3 min. Time and scale are as indicated.

1178

1179 **Supplemental Movie 2: Lysosome motility for H<sub>2</sub>O<sub>2</sub>-treated RAW macrophages.** Live-cell  
1180 imaging of RAW macrophages pre-labelled with Lucifer yellow and treated with 1 mM H<sub>2</sub>O<sub>2</sub> for  
1181 40 min. Single-plane acquired every 4 sec for 3 min. Time and scale are as indicated.

1182

1183 **Supplemental Movie 3: Lysosome motility for rotenone-treated RAW macrophages.** Live-  
1184 cell imaging of RAW macrophages pre-labelled with Lucifer yellow and treated with 1 μM  
1185 rotenone for 60 min. Single-plane acquired every 4 sec for 3 min. Time and scale are as indicated.

1186

1187 **Supplemental Movie 4: Lysosome motility for CDNB-treated RAW macrophages.** Live-cell  
1188 imaging of RAW macrophages pre-labelled with Lucifer yellow and treated with 10 μM CDNB  
1189 30 min. Single-plane acquired every 4 sec for 3 min. Time and scale are as indicated.

1190

1191 **Supplemental Movie 5: Lysosome motility for MCB-treated RAW macrophages.** Live-cell  
1192 imaging of RAW macrophages pre-labelled with Lucifer yellow and treated with 5 μM MCB 30  
1193 min. Single-plane acquired every 4 sec for 3 min. Time and scale are as indicated.

1194

1195 **Supplemental Movie 6: Lysosome motility for nocodazole-treated RAW macrophages.** Live-  
1196 cell imaging of RAW macrophages pre-labelled with Lucifer yellow and treated with 10 μM  
1197 nocodazole 60 min. Single-plane acquired every 4 sec for 3 min. Time and scale are as indicated.

1198

1199 **Supplemental Movie 7: Lysosome motility for vehicle-treated RPE cells.** Live-cell imaging of  
1200 RPE cells pre-labelled with Lucifer yellow and treated with vehicle-only. Single-plane acquired  
1201 every 8 sec for 6 min. Time and scale are as indicated.



1202

1203 **Supplemental Movie 8: Lysosome motility for H<sub>2</sub>O<sub>2</sub>-treated RPE cells.** Live-cell imaging of  
1204 RPE cells pre-labelled with Lucifer yellow and treated with 1 mM H<sub>2</sub>O<sub>2</sub> 40 min. Single-plane  
1205 acquired every 8 sec for 6 min. Time and scale are as indicated.

1206

1207 **Supplemental Movie 9: Lysosome motility for rotenone-treated RPE cells.** Live-cell imaging  
1208 of RPE cells pre-labelled with Lucifer yellow and treated with 1 µM rotenone 60 min. Single-  
1209 plane acquired every 8 sec for 6 min. Time and scale are as indicated.

1210

1211 **Supplemental Movie 10: Lysosome motility for CDNB-treated RPE cells.** Live-cell imaging  
1212 of RPE cells pre-labelled with Lucifer yellow and treated with 10 µM CDNB 30 min. Single-plane  
1213 acquired every 8 sec for 6 min. Time and scale are as indicated.

1214

1215 **Supplemental Movie 11: Lysosome motility for MCB-treated RPE cells.** Live-cell imaging of  
1216 RPE cells pre-labelled with Lucifer yellow and treated with 5 µM MCB 30 min. Single-plane  
1217 acquired every 8 sec for 6 min. Time and scale are as indicated.

1218

1219 **Supplemental Movie 12: Lysosome motility for nocodazole five micromolar treated RPE**  
1220 **cells.** Live-cell imaging of RPE cells pre-labelled with Lucifer yellow and treated with 5 µM  
1221 nocodazole 60 min. Single-plane acquired every 8 sec for 6 min. Time and scale are as indicated.

1222

1223 **Supplemental Movie 13: Lysosome motility for nocodazole ten micromolar treated RPE**

1224 **cells.** Live-cell imaging of RPE cells pre-labelled with Lucifer yellow and treated with 10  $\mu$ M

1225 nocodazole 60 min. Single-plane acquired every 8 sec for 6 min. Time and scale are as indicated.

1226

1227 **Supplemental Movie 14: Lysosome motility for vehicle-treated RAW macrophages.** Live-cell

1228 imaging of RAW cells pre-labelled with Lucifer yellow and treated with vehicle-only. Single-

1229 plane acquired every 4 sec for 3 min. Time and scale are as indicated.

1230

1231 **Supplemental Movie 15: Lysosome motility for paclitaxel one micromolar treated RAW**

1232 **macrophages.** Live-cell imaging of RAW cells pre-labelled with Lucifer yellow and treated with

1233 1  $\mu$ M paclitaxel 60 min. Single-plane acquired every 4 sec for 3 min. Time and scale are as

1234 indicated.

1235

1236 **Supplemental Movie 16: Lysosome motility for paclitaxel ten micromolar treated RAW**

1237 **macrophages.** Live-cell imaging of RAW cells pre-labelled with Lucifer yellow and treated with

1238 10  $\mu$ M paclitaxel 60 min. Single-plane acquired every 4 sec for 3 min. Time and scale are as

1239 indicated.

1240

1241

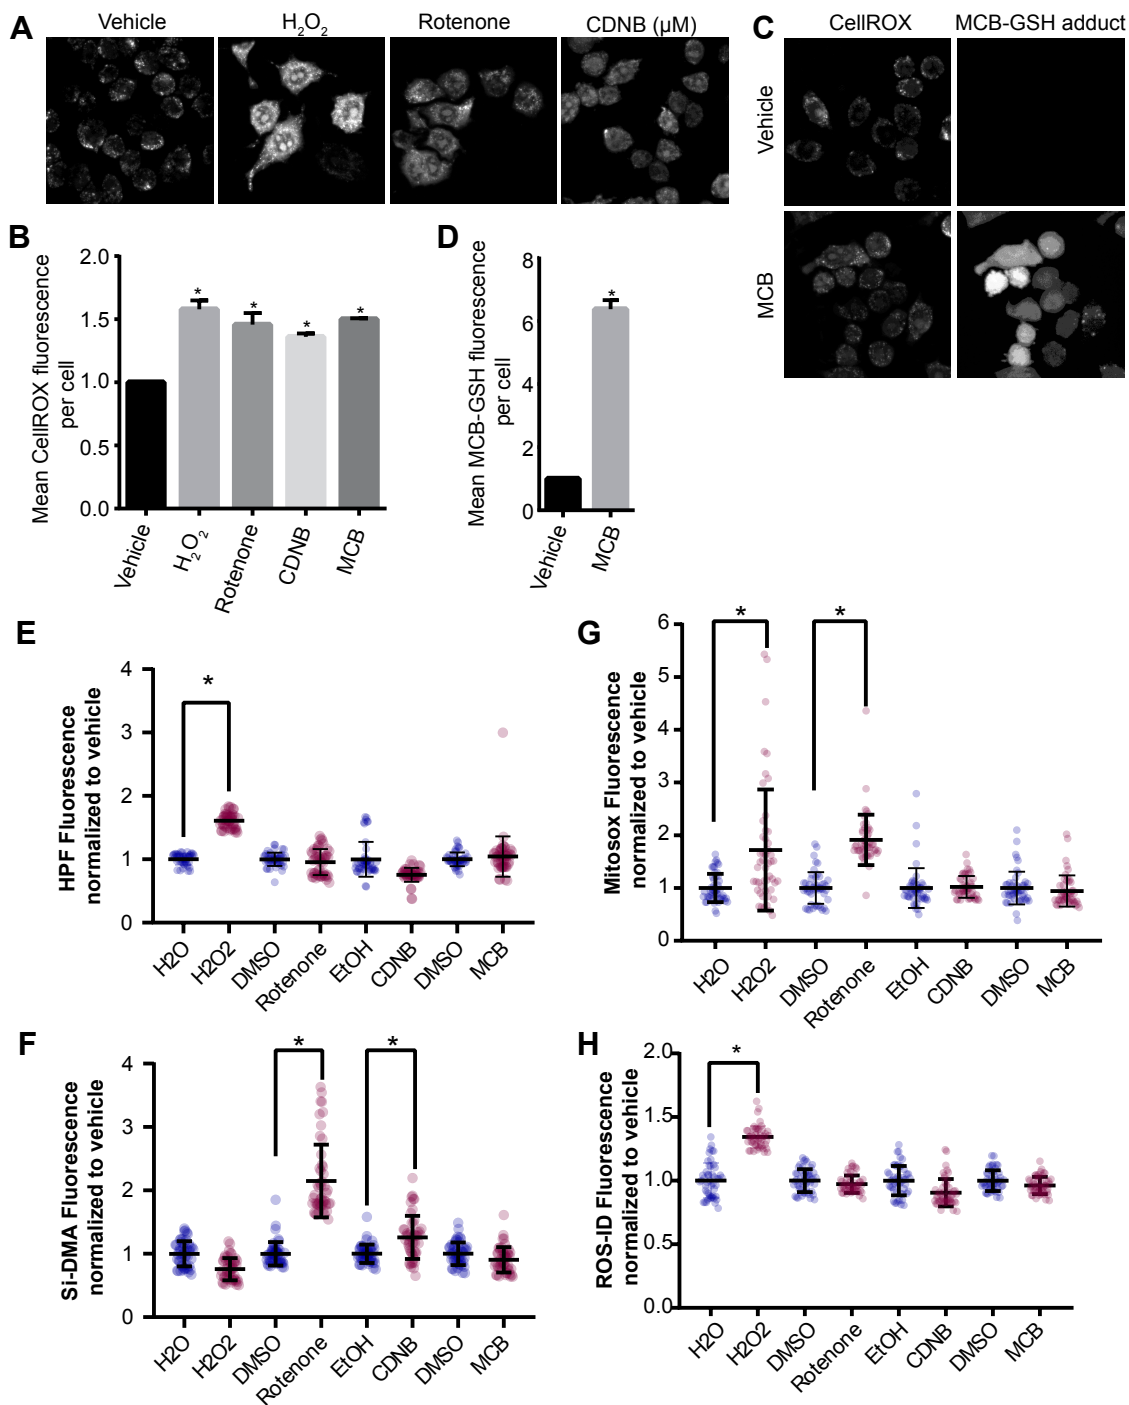

Figure 1

A

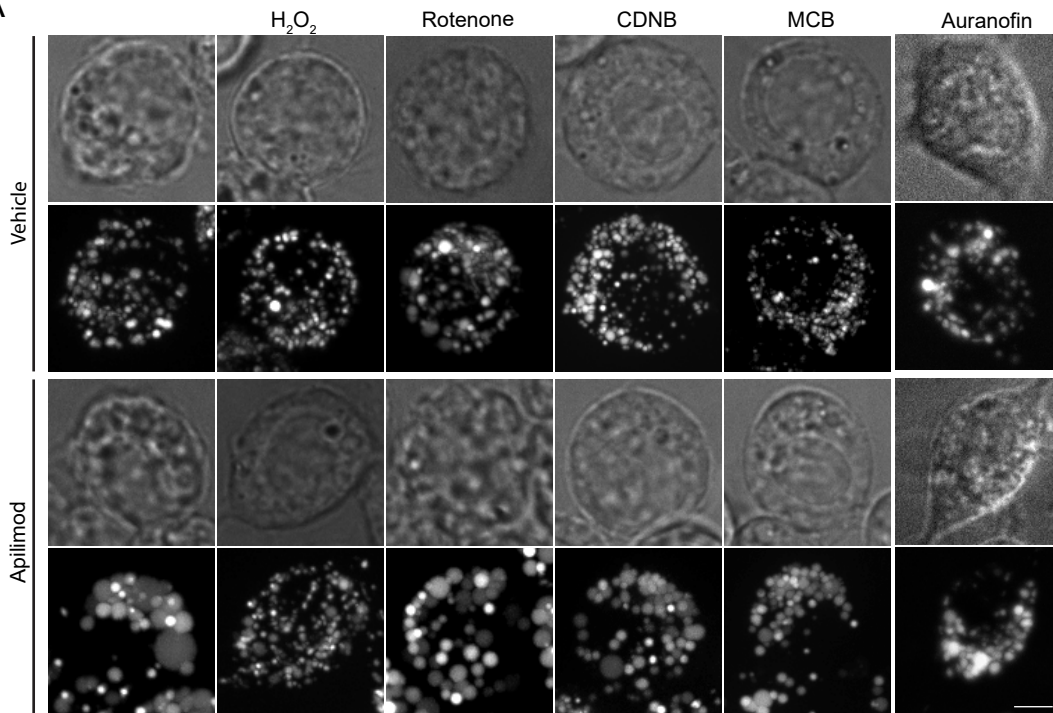

B

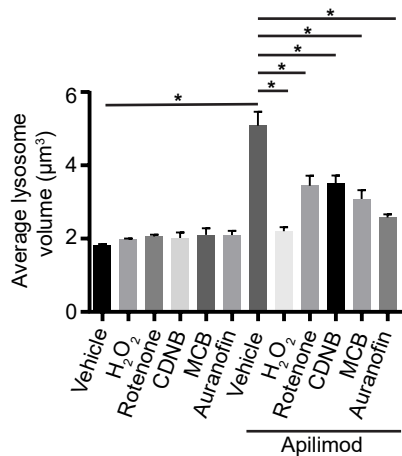

C

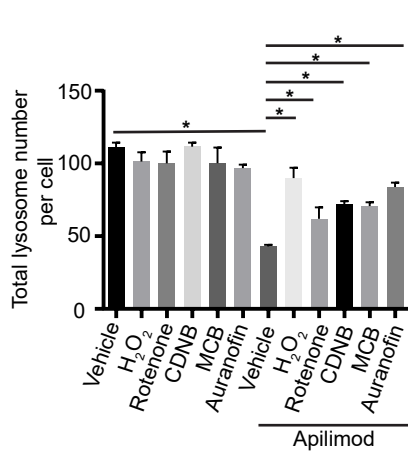

D

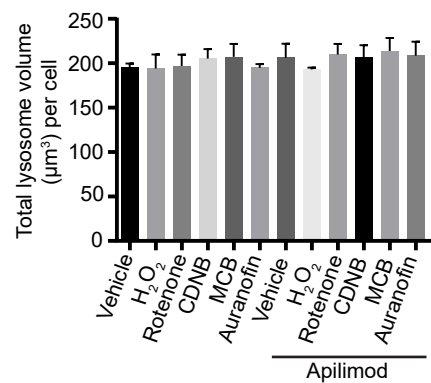

Figure 2

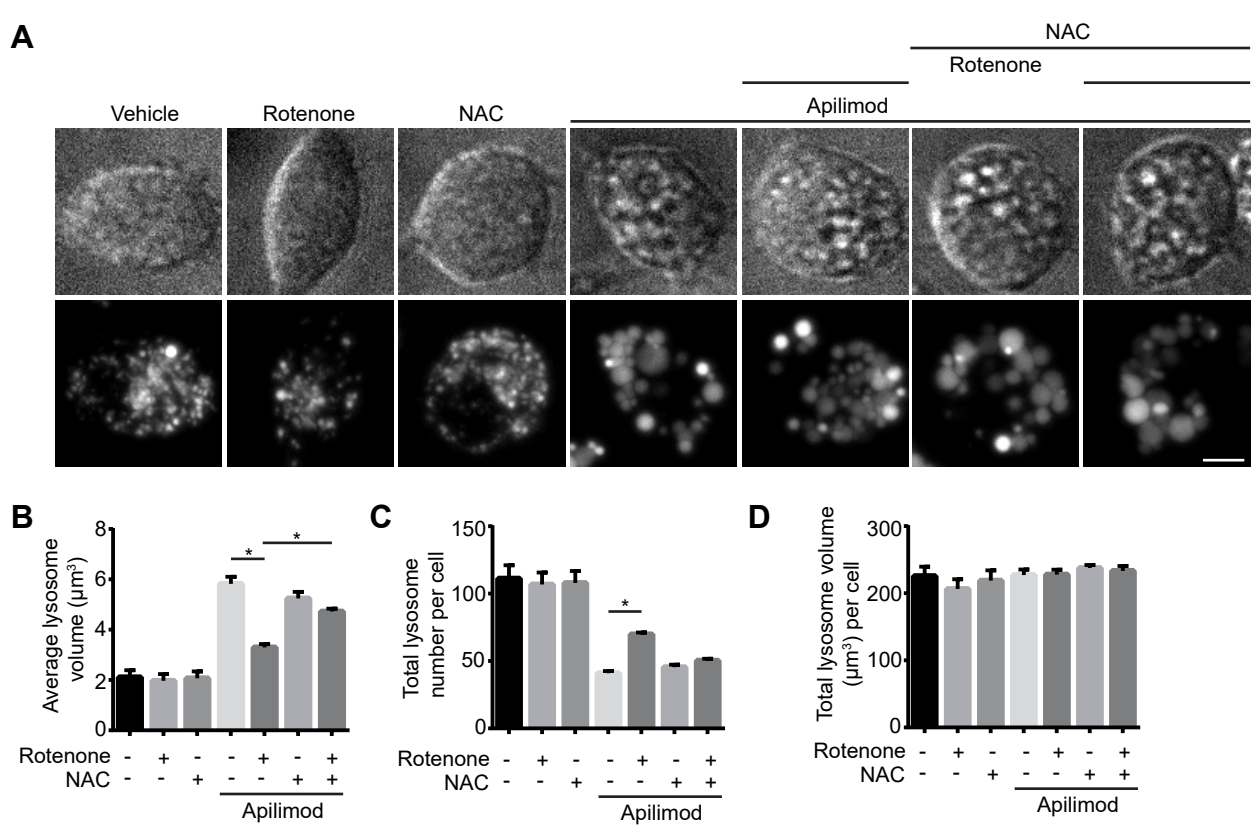

Figure 3

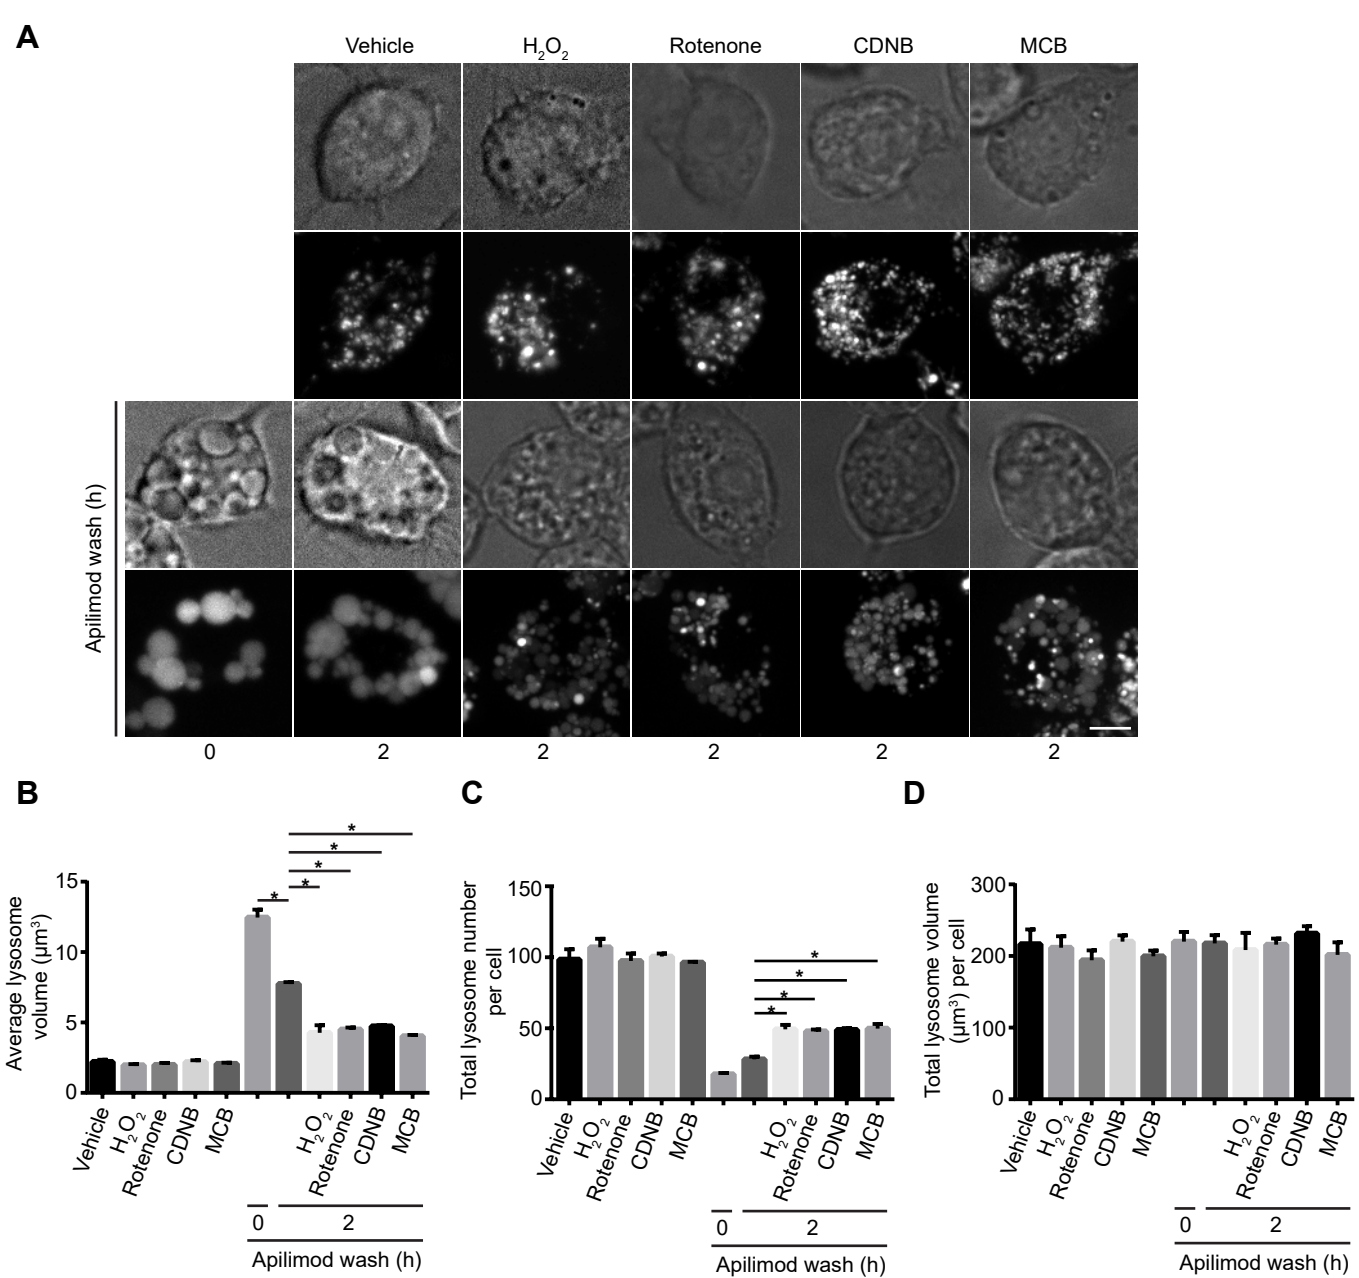

Figure 4

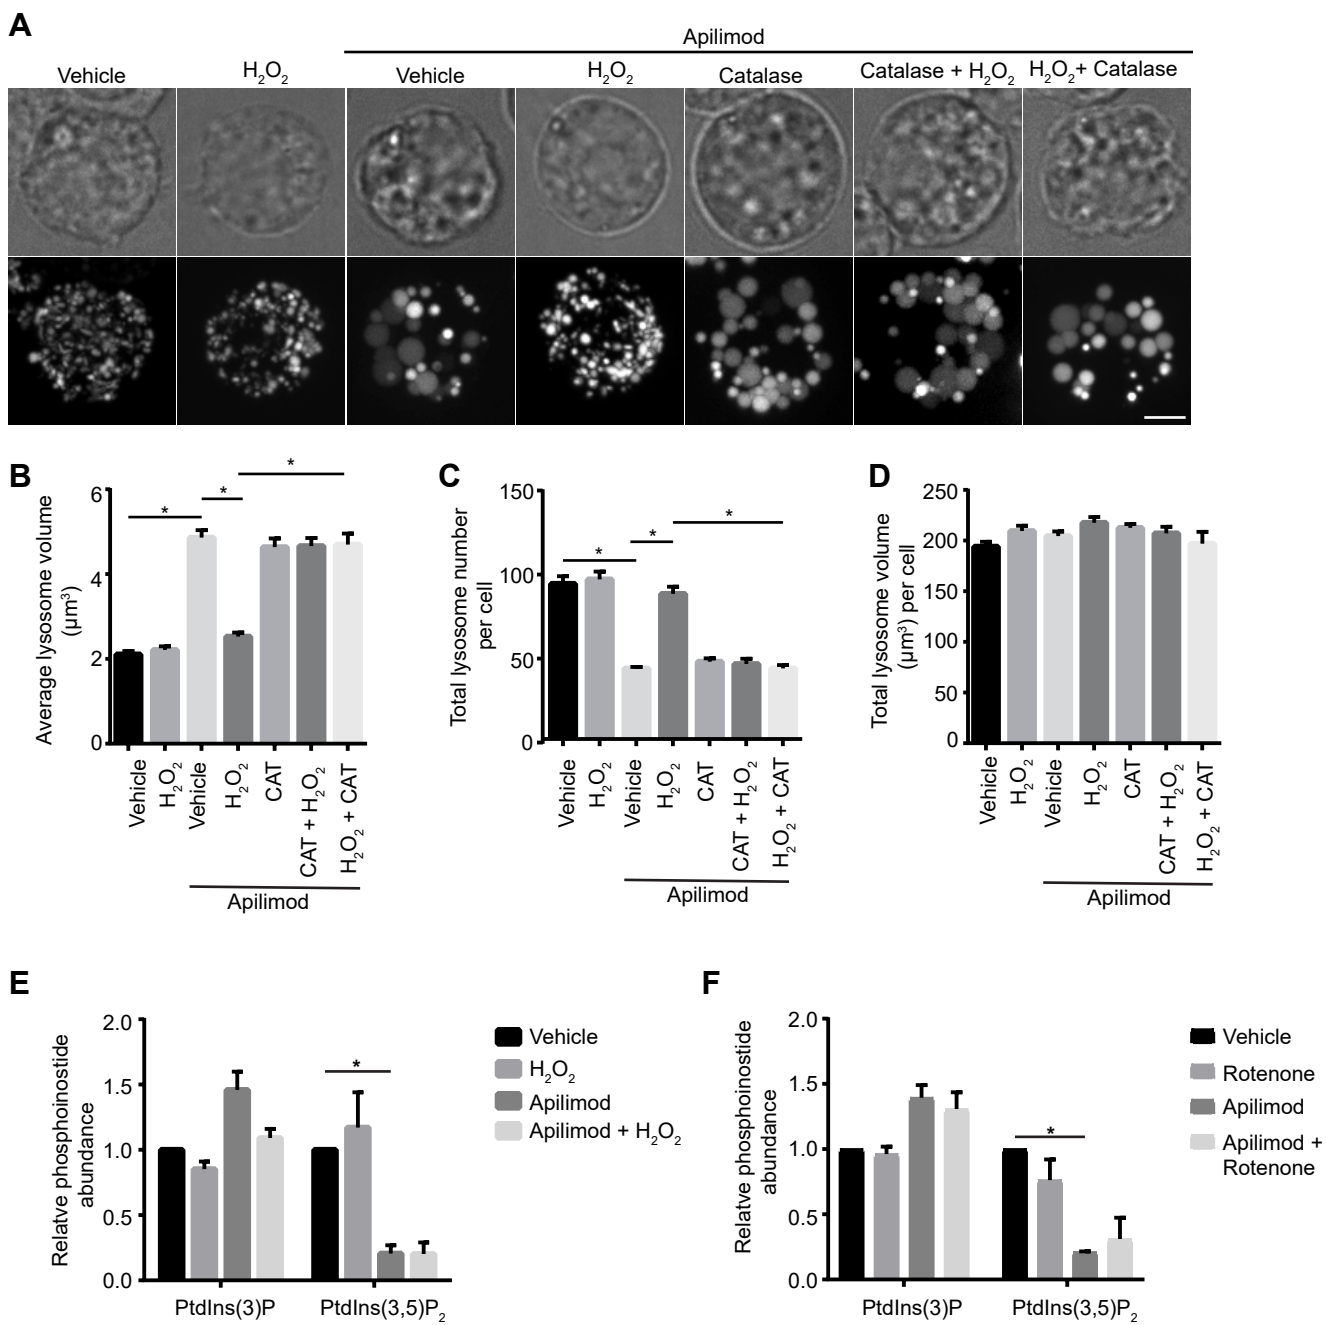

Figure 5

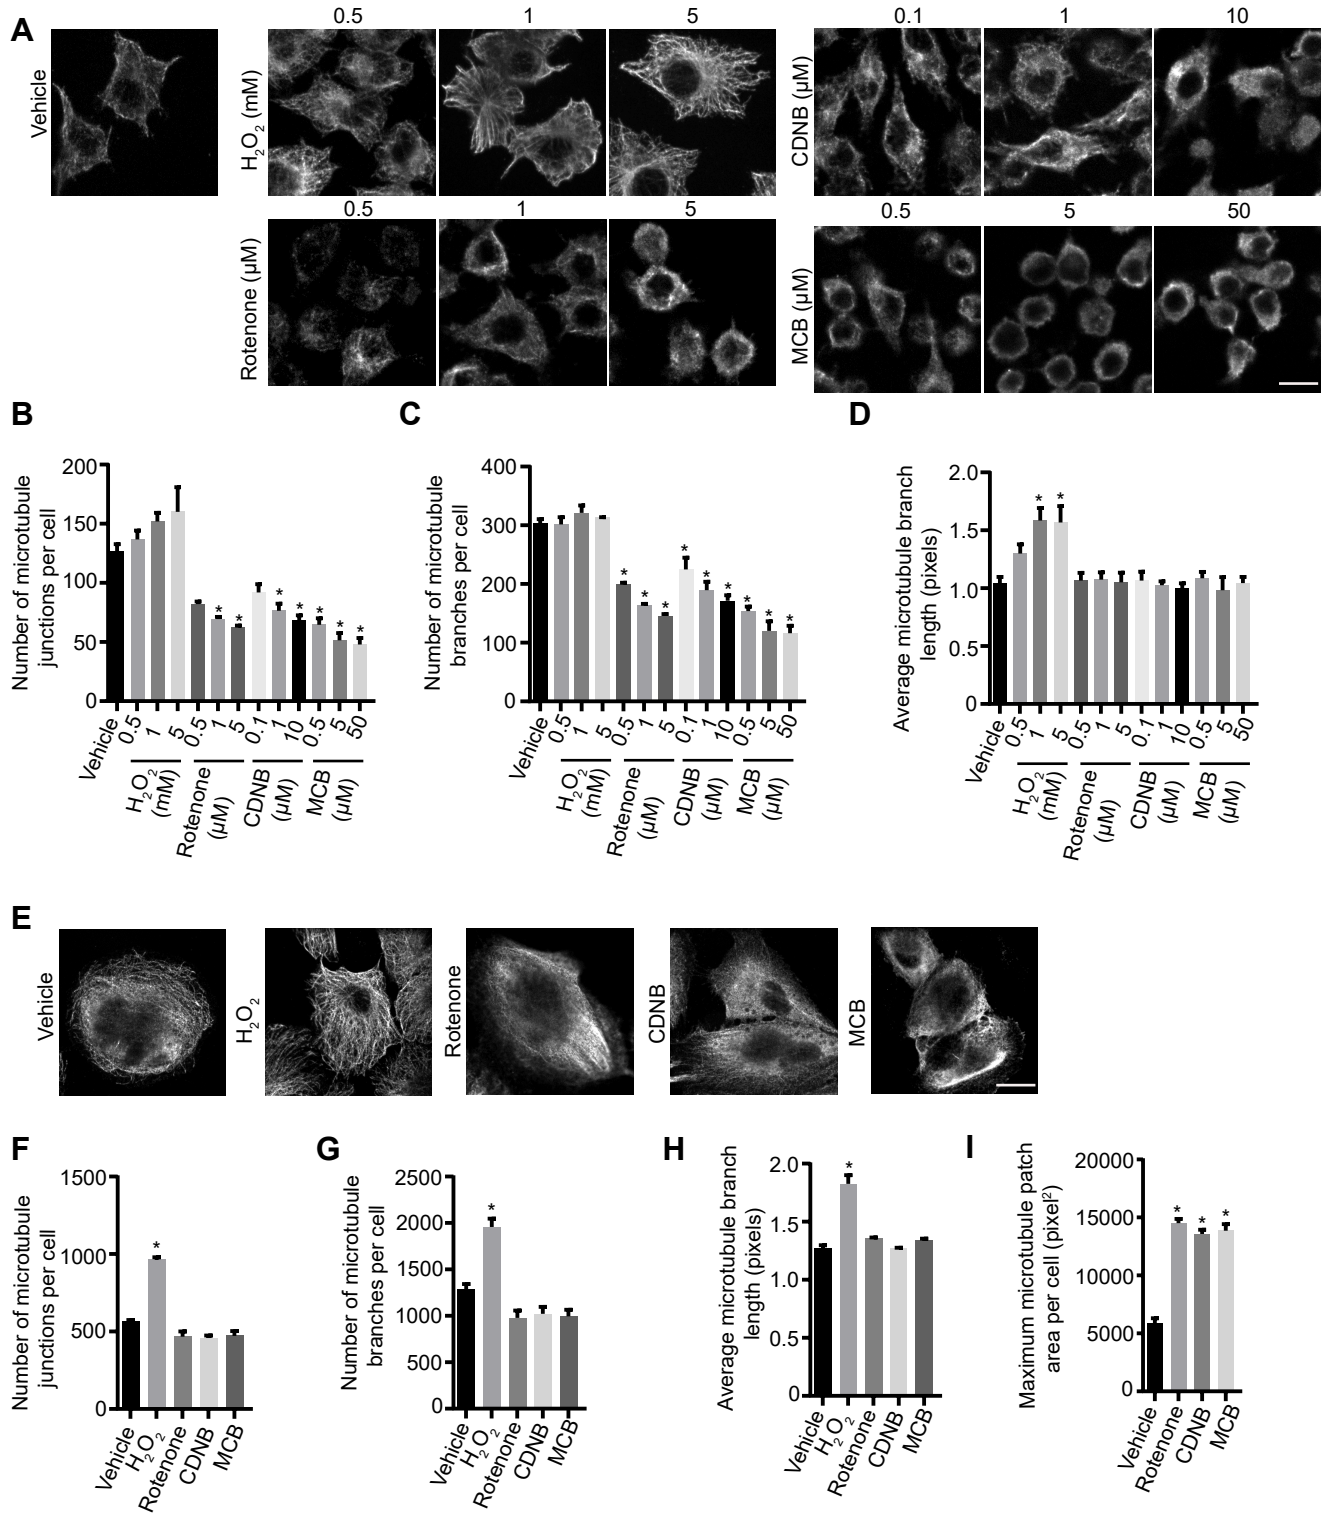

Figure 6



## RAW cells

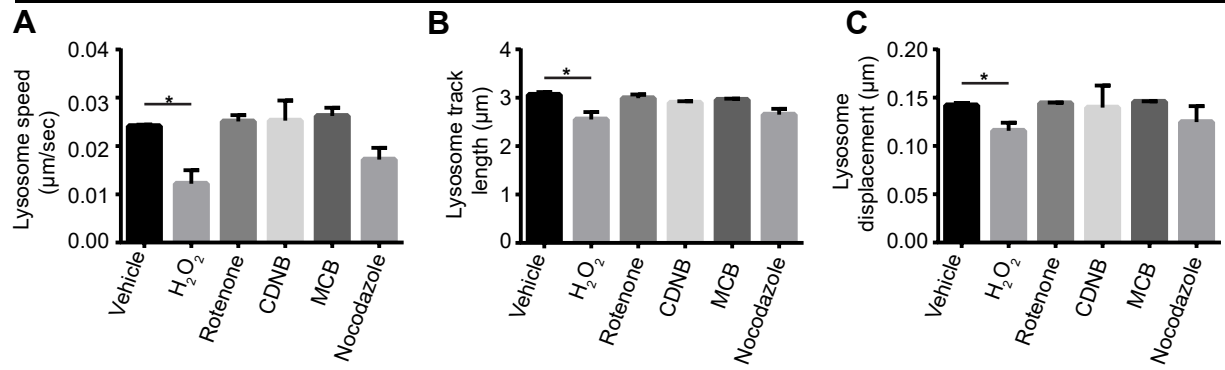

## RPE cells

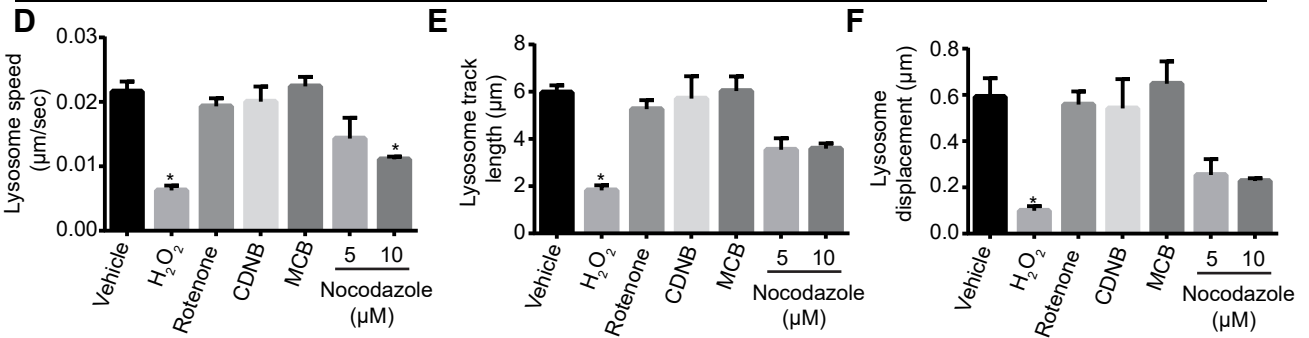

Figure 7

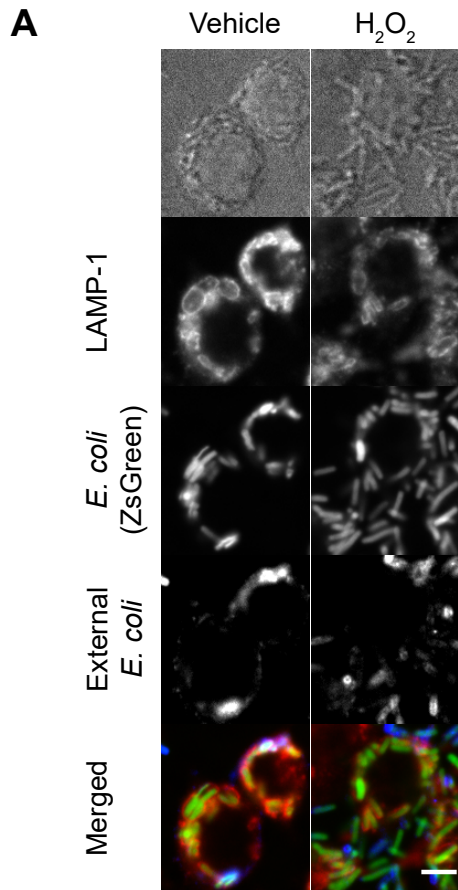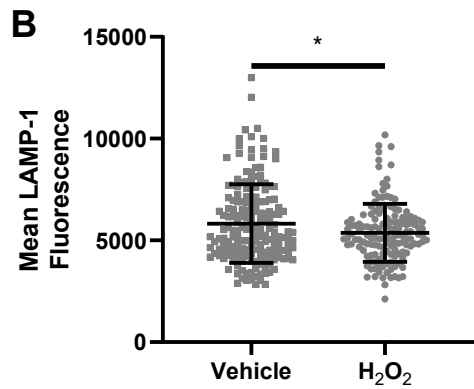

Figure 8

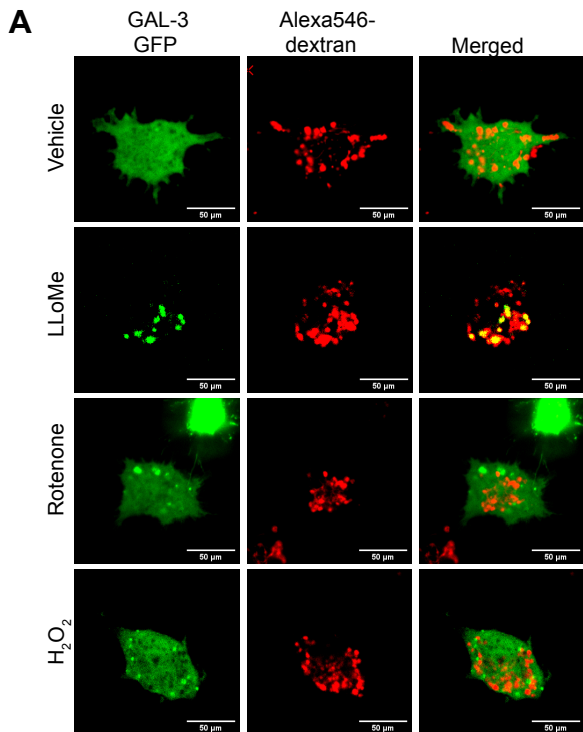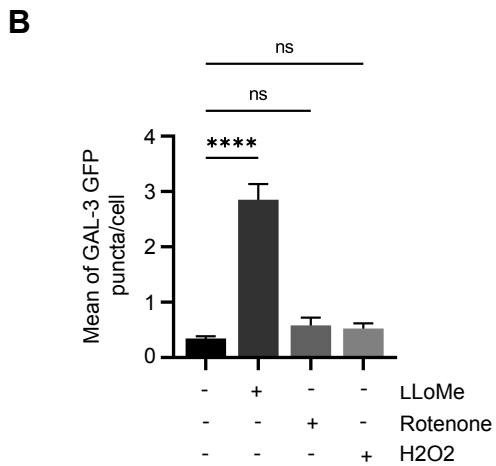

Figure 9

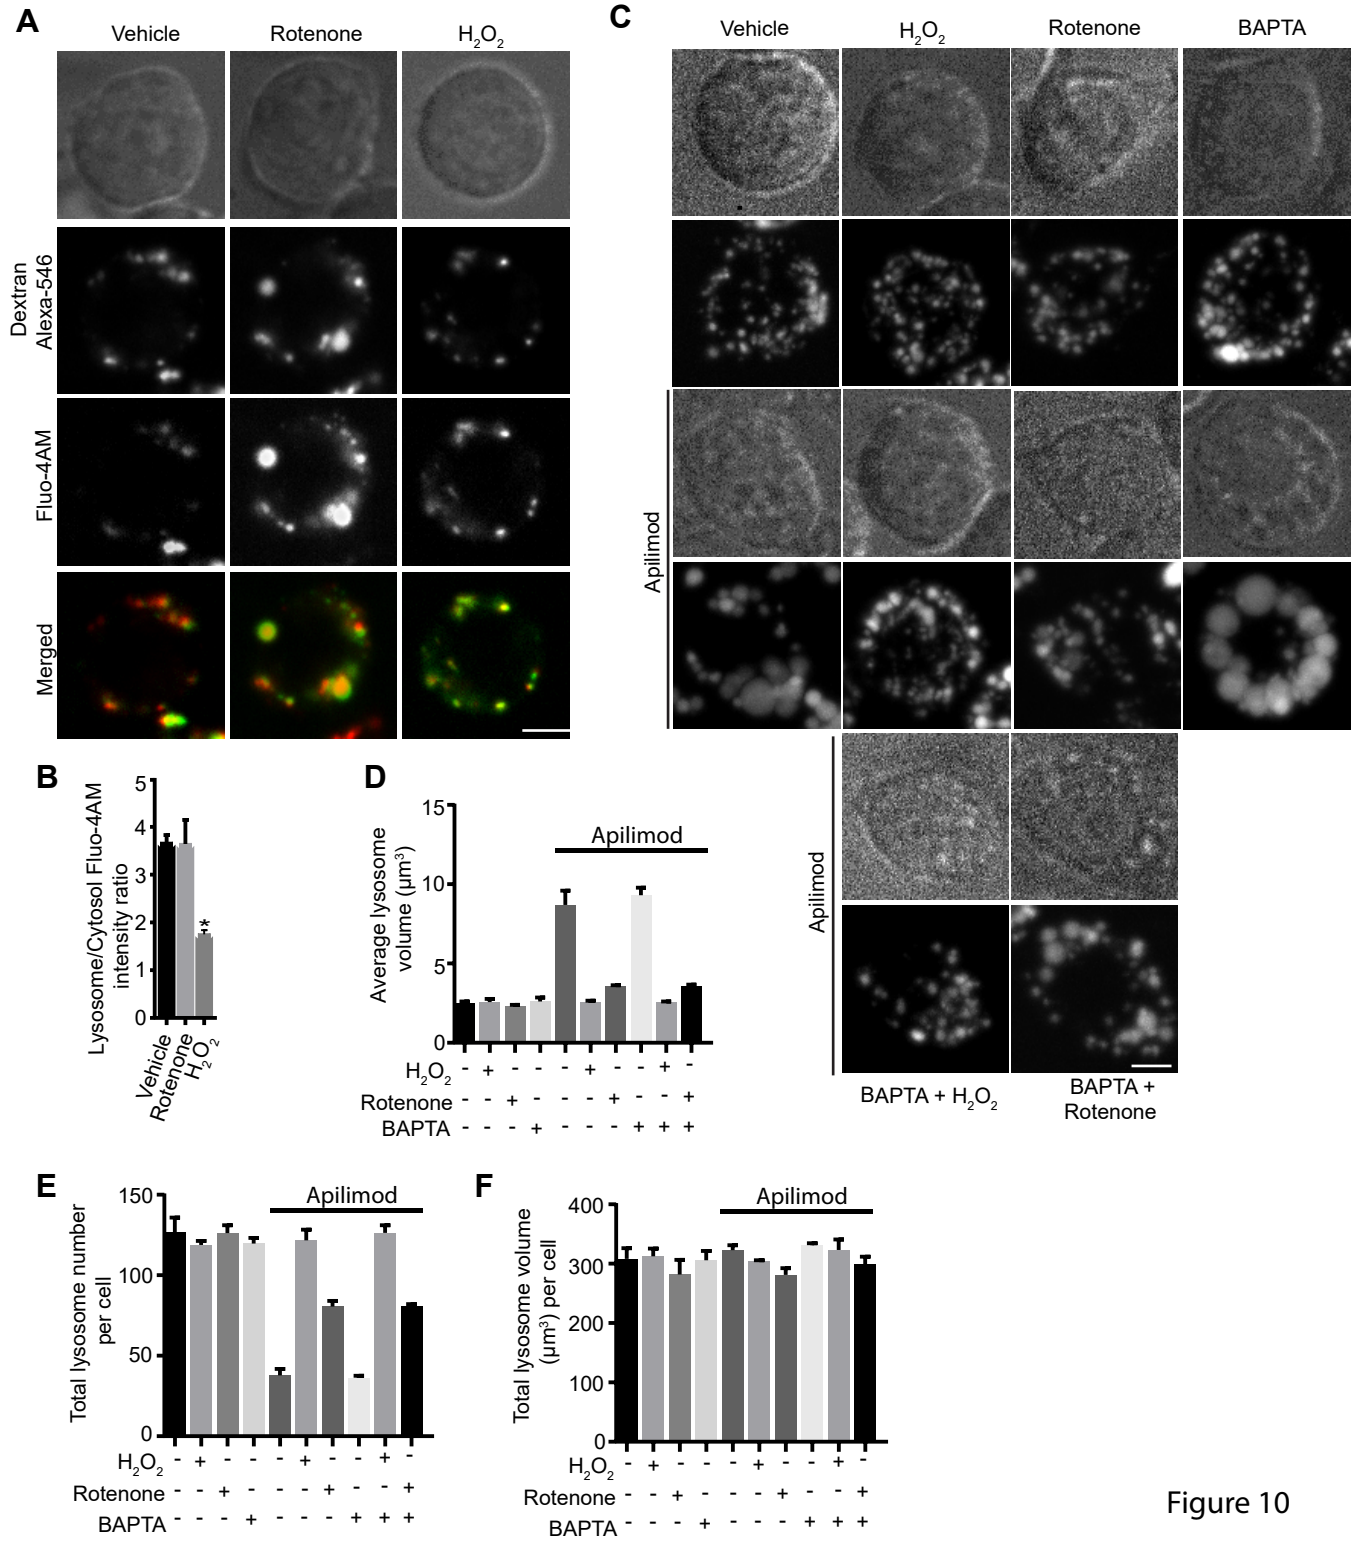

Figure 10

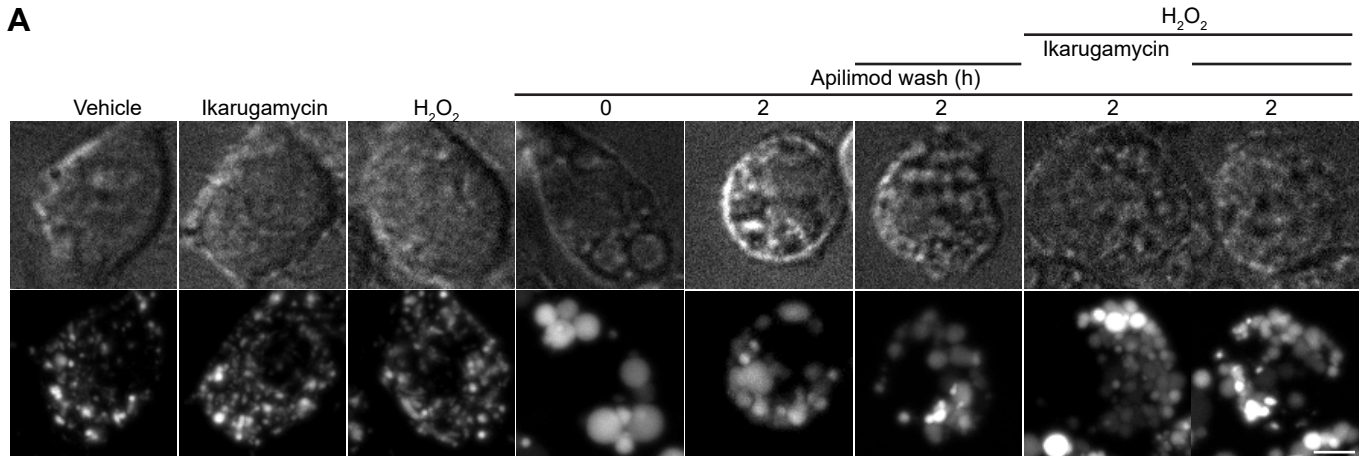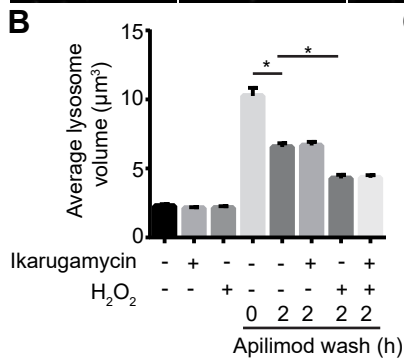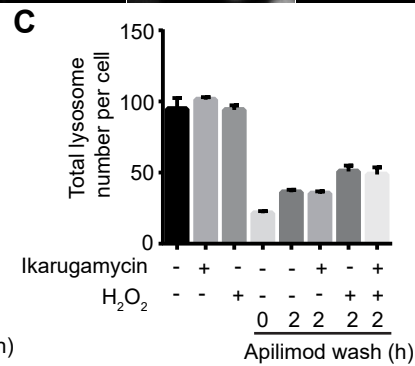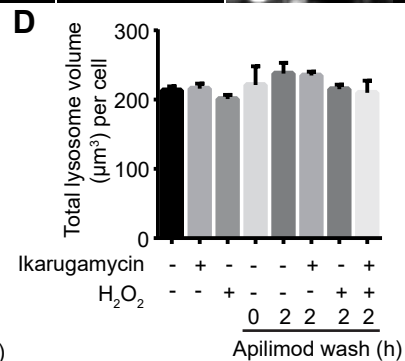

Figure 11

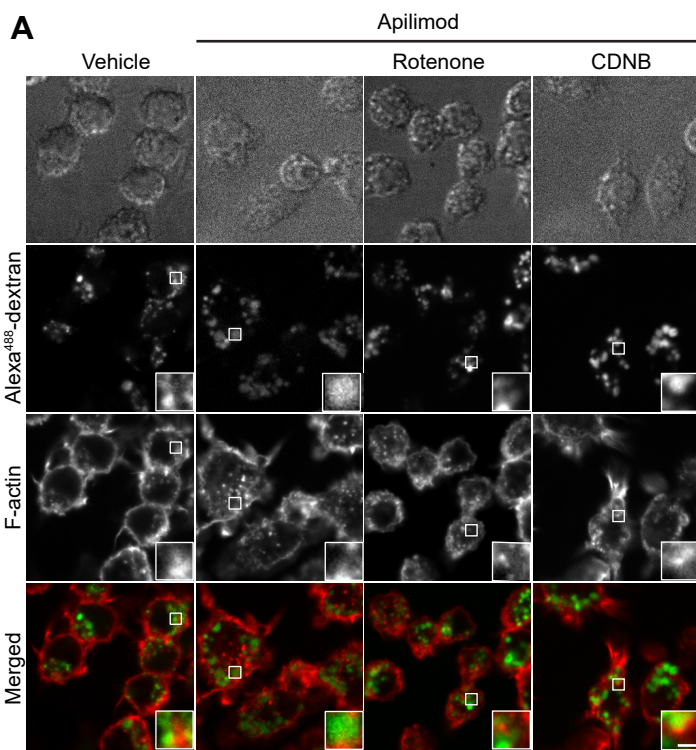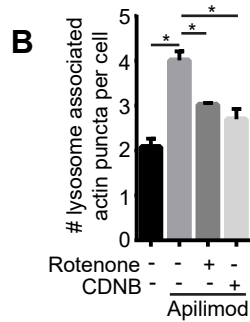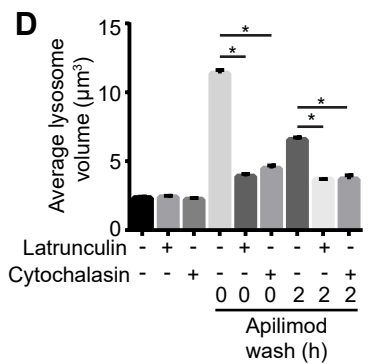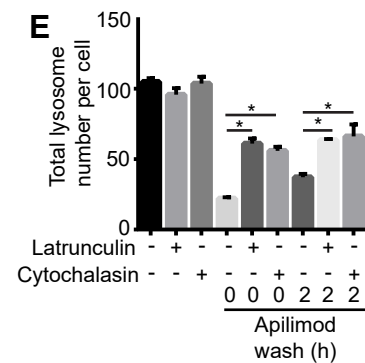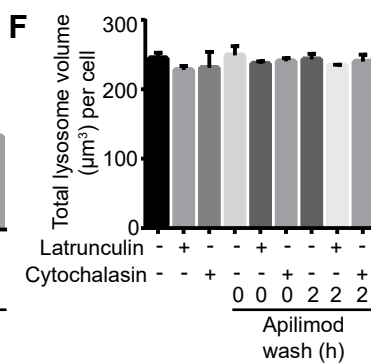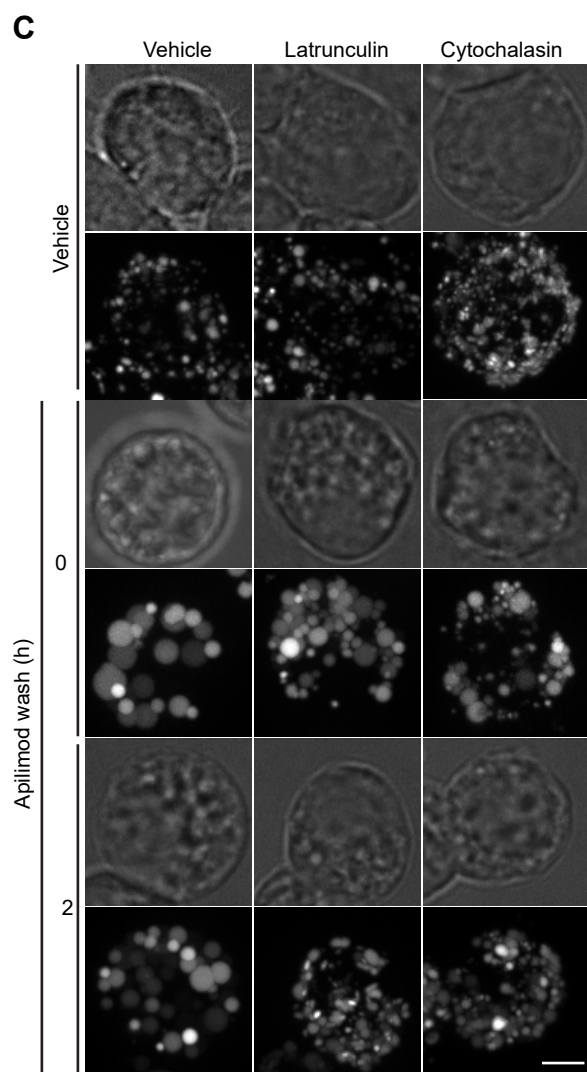

Figure 12
